# Supplementary material for: Genomic Characterization of Metformin Hepatic Response
Source: PubMed Central journal article supplement (PMC5130177; doi:10.1371/journal.pgen.1006449), 2016-11-30

**A**

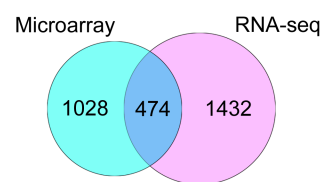

**B**

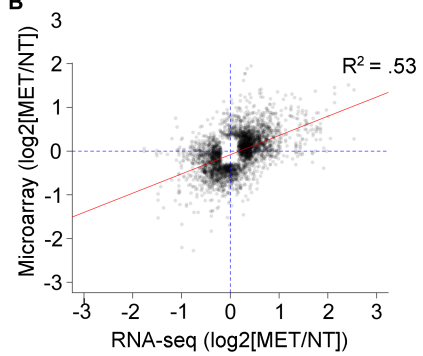

Supplement: pgen.1006449.s002.pdf [file pgen.1006449.s002.pdf]
