# Supplementary material for: Genomic Characterization of Metformin Hepatic Response
Source: PubMed Central journal article supplement (PMC5130177; doi:10.1371/journal.pgen.1006449), 2016-11-30
Supplement: pgen.1006449.s006.pdf [file pgen.1006449.s006.pdf]

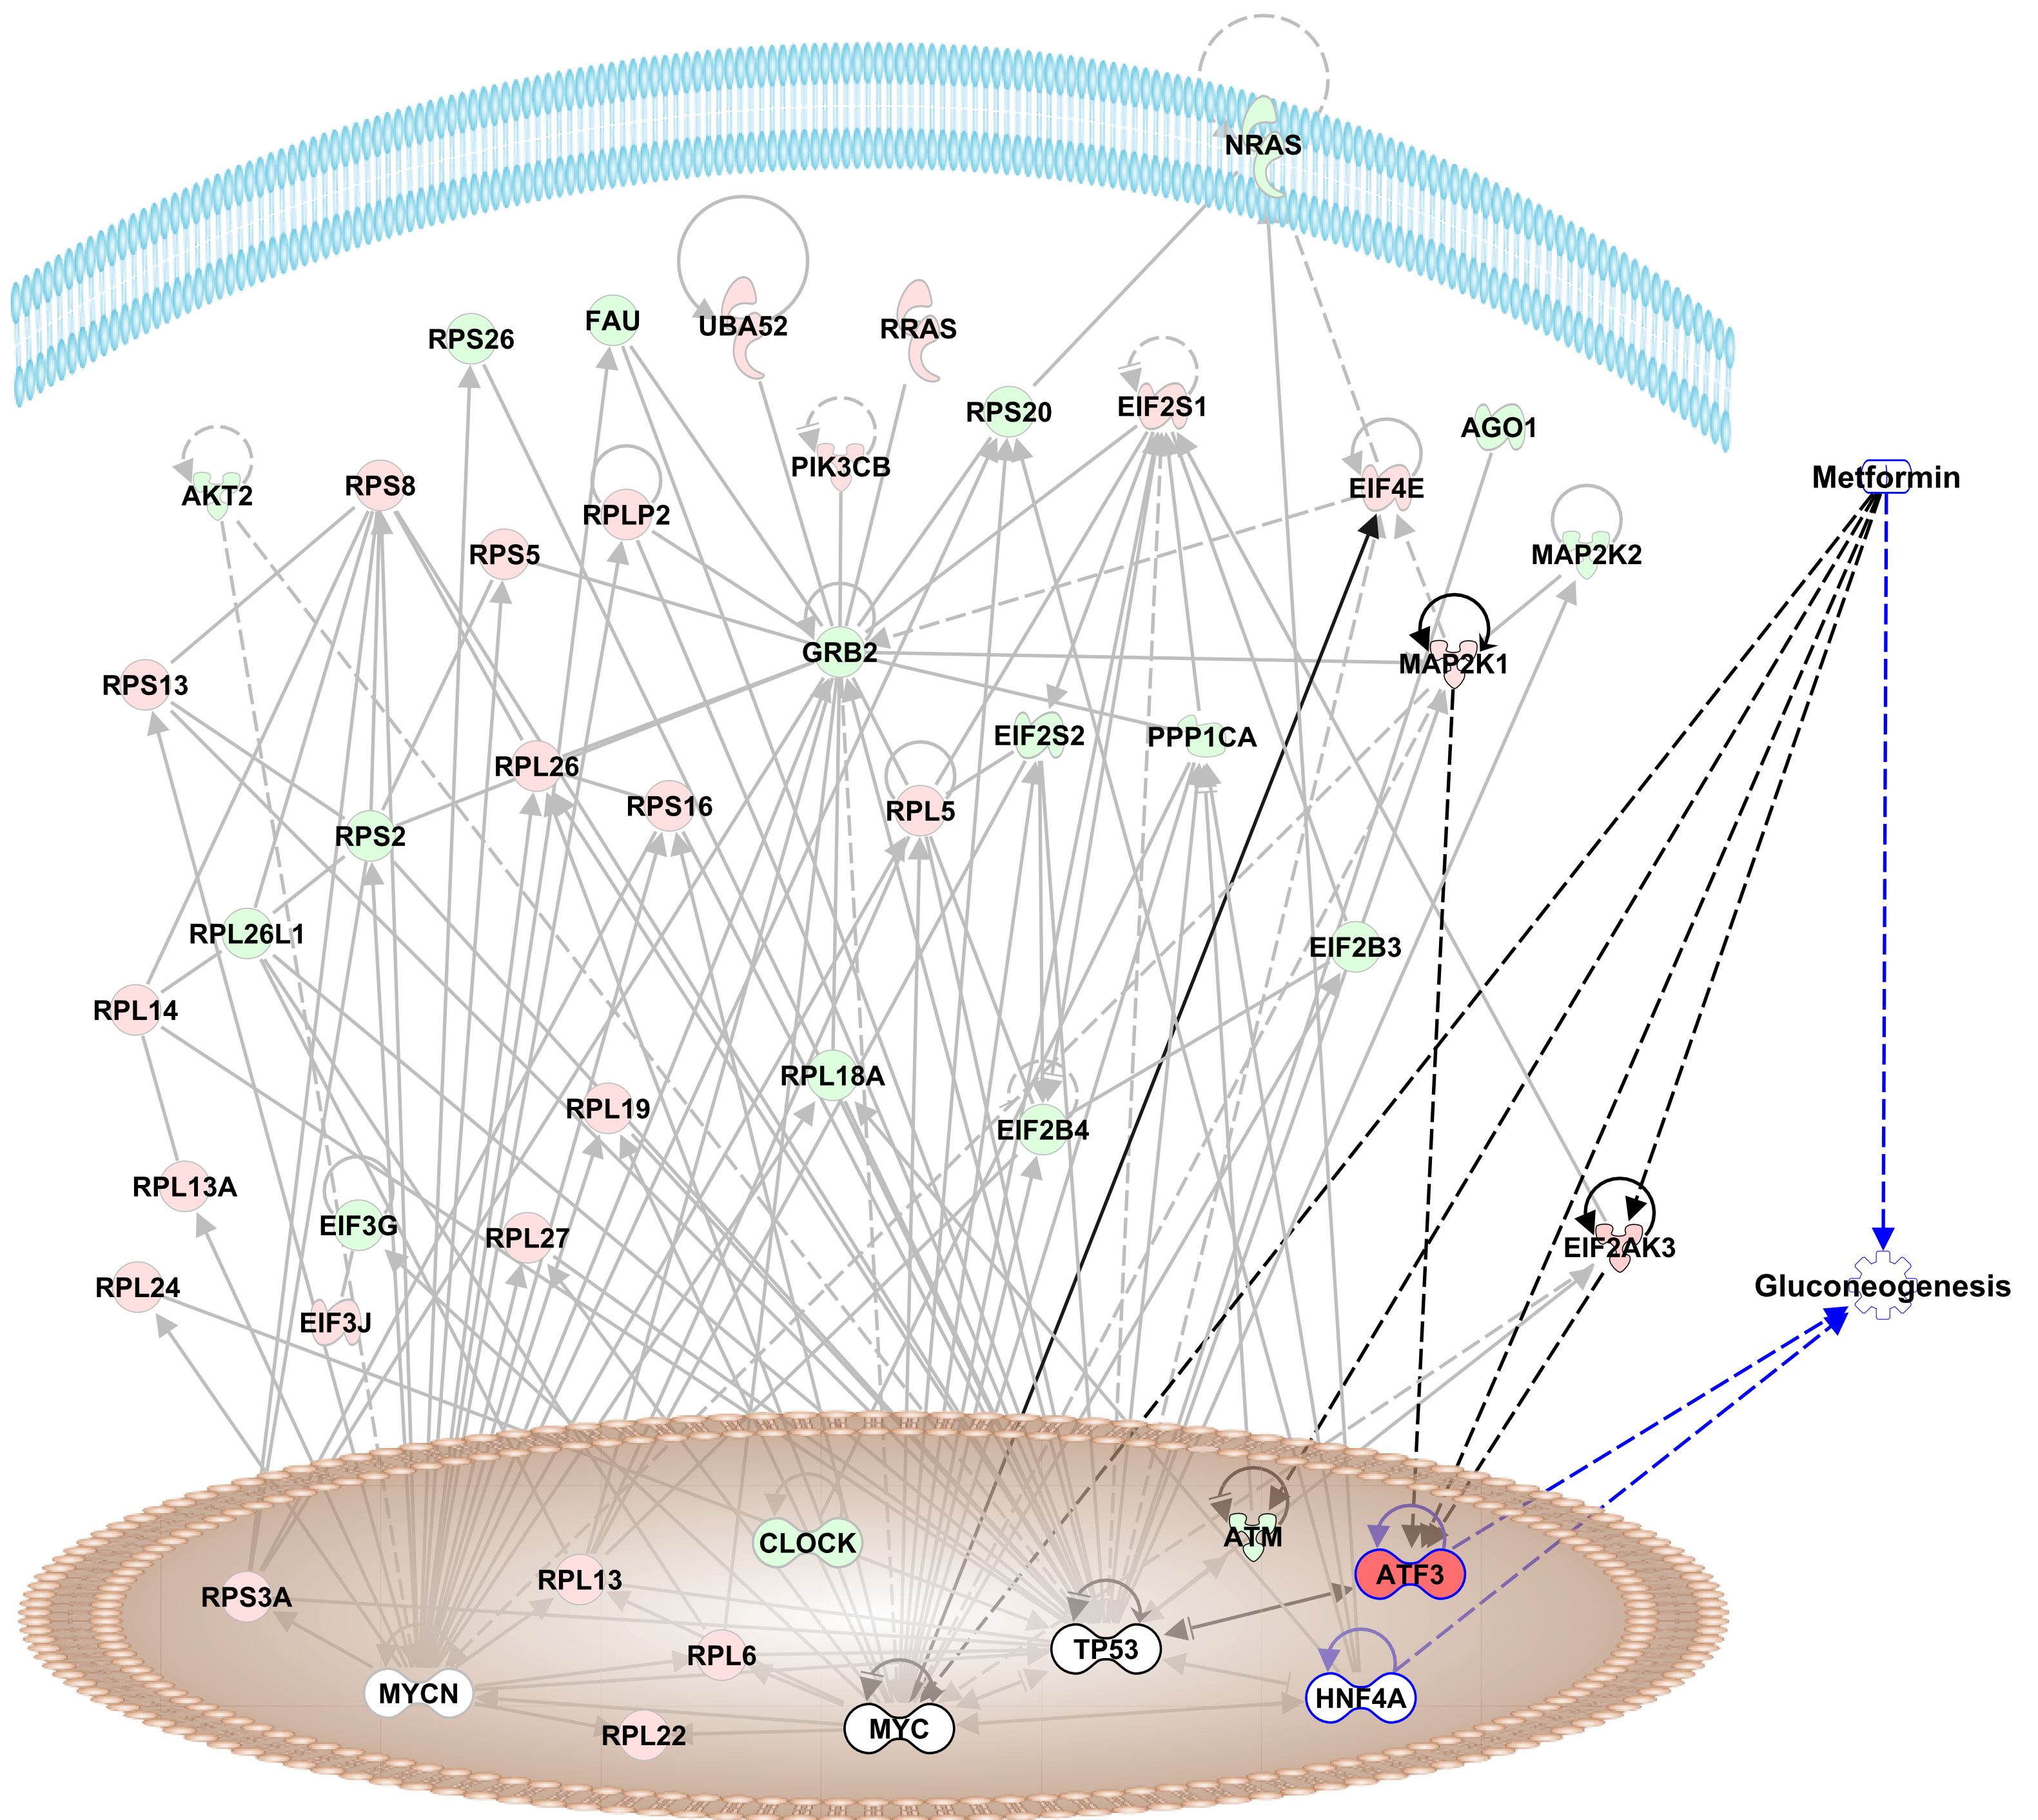

- |                                                                                                                    |                                                                                                                    |
|--------------------------------------------------------------------------------------------------------------------|--------------------------------------------------------------------------------------------------------------------|
|  <b>Drug</b>                    |  <b>Enzyme</b>                |
|  <b>Kinase</b>                  |  <b>Phosphatase</b>           |
|  <b>Transcription Regulator</b> |  <b>Translation Regulator</b> |
|  <b>Other</b>                   |  <b>Function</b>              |
|  <b>Direct Relationship</b>     |  <b>Indirect Relationship</b> |
