# Supplementary material for: Genomic Characterization of Metformin Hepatic Response
Source: PLoS Genet. 2016 Nov 30;12(11):e1006449. doi: 10.1371/journal.pgen.1006449 (PMC5130177; doi:10.1371/journal.pgen.1006449)
Supplement: S6 Table — (XLSX) [file pgen.1006449.s013.xlsx]

## Sheet: Sheet1
S6 Table. Differentially enriched H3K27ac ChIP-seq peak locations.
Chrom	Start	Stop	Name	log2FoldChange	adj. p-value
chr1	7459312	7464230	K27ac_merged_peak_113	1.08222	0.0465053
chr1	8128878	8212792	K27ac_merged_peak_127	0.281591	0.0306902
chr1	8550707	8560276	K27ac_merged_peak_134	0.803598	0.04987
chr1	8680143	8714988	K27ac_merged_peak_140	-0.54824	0.0159491
chr1	9208526	9248008	K27ac_merged_peak_154	0.507288	0.00195932
chr1	11842027	11875164	K27ac_merged_peak_215	0.538921	0.00125113
chr1	19350701	19458912	K27ac_merged_peak_306	-0.440592	0.000125065
chr1	20793409	20815409	K27ac_merged_peak_329	-0.471032	0.0190531
chr1	21331931	21350019	K27ac_merged_peak_348	0.749628	0.00177993
chr1	21381030	21398169	K27ac_merged_peak_350	0.97344	3.50537e-05
chr1	28553376	28630834	K27ac_merged_peak_529	-0.345497	0.017774
chr1	31882609	31967364	K27ac_merged_peak_580	0.950728	7.75579e-23
chr1	31970832	31991312	K27ac_merged_peak_581	1.1951	2.91017e-10
chr1	32011658	32018491	K27ac_merged_peak_583	1.04347	0.00577706
chr1	32164382	32172761	K27ac_merged_peak_588	-0.810617	0.018076
chr1	32869330	32880244	K27ac_merged_peak_610	0.75368	0.0226146
chr1	33198431	33268967	K27ac_merged_peak_621	0.3695	0.00368091
chr1	37991927	38013046	K27ac_merged_peak_700	0.841664	2.49362e-06
chr1	40717176	40750092	K27ac_merged_peak_752	0.521926	0.0152507
chr1	41153863	41242245	K27ac_merged_peak_765	-0.314093	0.0134
chr1	41400625	41421365	K27ac_merged_peak_775	-0.539578	0.0490629
chr1	41683382	41713100	K27ac_merged_peak_781	-0.451543	0.026381
chr1	46431560	46451723	K27ac_merged_peak_885	1.19865	6.60268e-08
chr1	47654662	47660353	K27ac_merged_peak_912	-0.977862	0.0446129
chr1	49379934	49387667	K27ac_merged_peak_942	0.768459	0.0456288
chr1	52142579	52166955	K27ac_merged_peak_969	0.552714	0.00442304
chr1	52178160	52245267	K27ac_merged_peak_971	0.456348	0.0073497
chr1	53111020	53132550	K27ac_merged_peak_992	1.46912	1.24994e-06
chr1	55305475	55360505	K27ac_merged_peak_1039	-0.330052	0.00836825
chr1	56783501	56806642	K27ac_merged_peak_1056	0.45602	0.0369368
chr1	56838007	57057693	K27ac_merged_peak_1059	0.314337	6.96012e-05
chr1	59847083	59927377	K27ac_merged_peak_1116	0.317418	0.0095119
chr1	59939133	59998644	K27ac_merged_peak_1118	0.288212	0.0456535
chr1	60004599	60028548	K27ac_merged_peak_1119	0.792226	4.36398e-08
chr1	60119711	60227329	K27ac_merged_peak_1123	0.475227	8.47149e-05
chr1	62281925	62321457	K27ac_merged_peak_1143	0.987562	0.00364724
chr1	64882954	64908967	K27ac_merged_peak_1173	0.706843	0.000222886
chr1	66743265	66771832	K27ac_merged_peak_1200	0.557365	0.00226945
chr1	66997265	67016022	K27ac_merged_peak_1207	0.930606	0.00267885
chr1	67384660	67429038	K27ac_merged_peak_1210	0.521645	6.4748e-05
chr1	69723781	69745921	K27ac_merged_peak_1242	0.540853	0.00470036
chr1	70619941	70626747	K27ac_merged_peak_1247	1.3859	0.000156491
chr1	78930344	78944438	K27ac_merged_peak_1304	-0.766884	0.00408176
chr1	83955356	83983786	K27ac_merged_peak_1336	0.480309	0.0447628
chr1	85766823	85812425	K27ac_merged_peak_1371	0.371423	0.00151842
chr1	94772590	94804002	K27ac_merged_peak_1512	-0.6426	4.40303e-05
chr1	95357973	95442926	K27ac_merged_peak_1521	-0.301492	0.0318179
chr1	95629299	95654694	K27ac_merged_peak_1528	-0.690733	0.00202361
chr1	95720826	95729491	K27ac_merged_peak_1531	-0.806882	0.0394721
chr1	96821883	96835202	K27ac_merged_peak_1536	0.84228	0.00283723
chr1	97601835	97613378	K27ac_merged_peak_1543	1.21064	3.98236e-05
chr1	97730516	97751241	K27ac_merged_peak_1548	0.649813	0.00351101
chr1	99631180	99644399	K27ac_merged_peak_1572	0.786109	0.00497897
chr1	100909379	100935067	K27ac_merged_peak_1596	0.898673	0.0013927
chr1	110498265	110512411	K27ac_merged_peak_1674	-0.648838	0.0362849
chr1	110516314	110566053	K27ac_merged_peak_1675	-0.460068	0.0170935
chr1	112409712	112459010	K27ac_merged_peak_1709	0.457508	0.000673384
chr1	116647600	116669462	K27ac_merged_peak_1775	-0.532371	0.0355436
chr1	119500093	119512288	K27ac_merged_peak_1827	-0.560418	0.0160255
chr1	120475095	120533464	K27ac_merged_peak_1852	0.356654	0.0452163
chr1	121483048	121485871	K27ac_merged_peak_1864	-0.457918	1.24464e-10
chr1	145109563	145118378	K27ac_merged_peak_1898	0.643187	0.000324728
chr1	146750328	146768190	K27ac_merged_peak_1937	1.09302	9.76189e-05
chr1	147079684	147087181	K27ac_merged_peak_1943	1.34986	0.00101998
chr1	149896593	149917513	K27ac_merged_peak_1968	0.474817	0.032065
chr1	150120366	150129094	K27ac_merged_peak_1972	1.13311	0.000811205
chr1	150927198	150961651	K27ac_merged_peak_1994	-0.472632	0.00402295
chr1	153532660	153546694	K27ac_merged_peak_2045	0.568132	0.00552317
chr1	154373084	154445006	K27ac_merged_peak_2062	0.274036	0.0160577
chr1	155073483	155115077	K27ac_merged_peak_2081	0.337281	0.0198729
chr1	155424314	155485599	K27ac_merged_peak_2091	0.617554	0.000832653
chr1	156035086	156058287	K27ac_merged_peak_2111	-0.686338	0.00494822
chr1	156672777	156680673	K27ac_merged_peak_2133	1.00497	0.012298
chr1	159472742	159483855	K27ac_merged_peak_2158	-0.922877	0.00669793
chr1	162021210	162068791	K27ac_merged_peak_2210	0.383526	0.04302
chr1	165597315	165621777	K27ac_merged_peak_2248	-0.691957	0.00153912
chr1	169436887	169469601	K27ac_merged_peak_2316	0.463528	0.0075905
chr1	169472882	169567567	K27ac_merged_peak_2317	0.336855	0.00484555
chr1	171784204	171790340	K27ac_merged_peak_2342	1.11031	0.0296052
chr1	172409324	172457431	K27ac_merged_peak_2344	0.306908	0.0326473
chr1	172458609	172477841	K27ac_merged_peak_2345	0.80043	0.000165879
chr1	176479854	176493217	K27ac_merged_peak_2406	0.770266	0.000364529
chr1	178384079	178390063	K27ac_merged_peak_2421	1.1128	0.0199824
chr1	178618552	178627353	K27ac_merged_peak_2426	1.01352	0.00273497
chr1	183884103	183888563	K27ac_merged_peak_2522	1.43661	0.0115958
chr1	197137681	197153603	K27ac_merged_peak_2620	-0.778029	0.000114735
chr1	199416010	199420944	K27ac_merged_peak_2648	-1.15201	0.0153012
chr1	201967598	202008448	K27ac_merged_peak_2695	0.461641	0.000353163
chr1	202010316	202021157	K27ac_merged_peak_2696	0.828678	0.00867734
chr1	202552011	202572142	K27ac_merged_peak_2708	0.498801	0.0203465
chr1	207057205	207076676	K27ac_merged_peak_2795	1.07253	1.61839e-06
chr1	208178534	208185167	K27ac_merged_peak_2816	0.987665	0.00972236
chr1	209772745	209806079	K27ac_merged_peak_2838	0.40451	0.0376714
chr1	209996034	210020175	K27ac_merged_peak_2843	0.464256	0.0411725
chr1	212397395	212438761	K27ac_merged_peak_2888	0.561634	1.07539e-05
chr1	212649576	212669109	K27ac_merged_peak_2895	0.931305	3.98236e-05
chr1	212728373	212744840	K27ac_merged_peak_2897	1.13279	2.9434e-09
chr1	212765510	212788832	K27ac_merged_peak_2898	0.823979	2.76666e-08
chr1	213447452	213454789	K27ac_merged_peak_2912	1.02406	0.0364195
chr1	214137912	214233114	K27ac_merged_peak_2923	-0.448823	2.82656e-05
chr1	214381405	214398867	K27ac_merged_peak_2928	-0.685015	0.00585822
chr1	219243138	219255646	K27ac_merged_peak_2971	-0.727439	0.0490629
chr1	219967148	219975478	K27ac_merged_peak_2979	1.05009	0.0278327
chr1	221835130	221854525	K27ac_merged_peak_3015	0.612393	0.00709441
chr1	221863828	221923000	K27ac_merged_peak_3016	0.358732	0.00383096
chr1	221939480	221959852	K27ac_merged_peak_3017	0.967985	7.95415e-05
chr1	221961600	221971620	K27ac_merged_peak_3018	1.361	0.000194799
chr1	221973068	222033073	K27ac_merged_peak_3019	1.00534	2.61236e-19
chr1	222035151	222068666	K27ac_merged_peak_3020	0.920387	2.03796e-09
chr1	222131243	222140260	K27ac_merged_peak_3021	0.856024	0.000207825
chr1	222152112	222173016	K27ac_merged_peak_3022	1.06505	2.20048e-06
chr1	222174440	222186818	K27ac_merged_peak_3023	0.891732	0.0119034
chr1	222224555	222254572	K27ac_merged_peak_3025	0.690696	2.1488e-05
chr1	222274742	222283171	K27ac_merged_peak_3026	1.07543	0.00949665
chr1	222336864	222348154	K27ac_merged_peak_3027	0.991451	0.0104257
chr1	223970457	224042669	K27ac_merged_peak_3062	0.401878	0.00355601
chr1	224909179	224926893	K27ac_merged_peak_3083	0.818137	9.29816e-05
chr1	225692688	225704123	K27ac_merged_peak_3093	0.763897	0.0120606
chr1	225804071	225810934	K27ac_merged_peak_3095	1.45138	0.000679692
chr1	227257566	227265581	K27ac_merged_peak_3127	1.65972	3.10995e-06
chr1	228960950	229006400	K27ac_merged_peak_3160	0.375584	0.0108901
chr1	229282062	229309631	K27ac_merged_peak_3171	0.604716	0.0278923
chr1	231365430	231383495	K27ac_merged_peak_3207	-0.631378	0.0238775
chr1	232796801	232824603	K27ac_merged_peak_3217	0.582867	0.00674507
chr1	232837791	232847836	K27ac_merged_peak_3218	0.768434	0.00440753
chr1	233780387	233816276	K27ac_merged_peak_3238	1.00151	8.95287e-14
chr1	234630791	234693287	K27ac_merged_peak_3250	0.299725	0.0134661
chr1	234729554	234764175	K27ac_merged_peak_3253	0.282853	0.0442232
chr1	234837533	234873289	K27ac_merged_peak_3257	0.369339	0.0334006
chr1	235560681	235583125	K27ac_merged_peak_3278	0.549688	0.00992347
chr1	236053727	236126296	K27ac_merged_peak_3290	0.473459	4.25779e-05
chr1	236130672	236191062	K27ac_merged_peak_3291	0.461136	0.0156777
chr1	236321218	236340853	K27ac_merged_peak_3296	0.663273	0.0332208
chr1	237065551	237073606	K27ac_merged_peak_3311	0.90836	0.0288413
chr1	240632400	240640907	K27ac_merged_peak_3327	1.13007	0.0085647
chr1	241316187	241325955	K27ac_merged_peak_3332	1.03586	0.00105737
chr1	241733643	241812024	K27ac_merged_peak_3338	0.385937	0.000561784
chr1	244461327	244472965	K27ac_merged_peak_3361	1.07128	0.00715391
chr10	3814742	3863602	K27ac_merged_peak_3443	0.516868	2.92991e-07
chr10	3864885	3915757	K27ac_merged_peak_3444	0.683865	1.08997e-08
chr10	3916503	3959080	K27ac_merged_peak_3445	0.7615	2.63063e-06
chr10	3970653	3986499	K27ac_merged_peak_3446	0.724402	0.0151825
chr10	4687224	4727450	K27ac_merged_peak_3451	0.489008	0.000241708
chr10	4759990	4779384	K27ac_merged_peak_3453	0.53944	0.0150396
chr10	4803905	4816388	K27ac_merged_peak_3454	1.01093	1.72243e-05
chr10	5039546	5068601	K27ac_merged_peak_3465	-0.559668	0.00288323
chr10	5106824	5125183	K27ac_merged_peak_3467	-0.852964	2.14282e-05
chr10	5129720	5152618	K27ac_merged_peak_3468	-0.821326	1.1808e-06
chr10	5188505	5208009	K27ac_merged_peak_3471	-0.633485	0.00421711
chr10	5322339	5336360	K27ac_merged_peak_3477	-0.662683	0.0110501
chr10	6335623	6347523	K27ac_merged_peak_3505	0.702582	0.00690952
chr10	7727637	7779298	K27ac_merged_peak_3512	-0.496335	0.000241708
chr10	11537953	11655269	K27ac_merged_peak_3527	0.436148	3.4318e-05
chr10	12107314	12150062	K27ac_merged_peak_3543	0.418417	0.0316809
chr10	12338906	12345719	K27ac_merged_peak_3553	0.915388	0.0480304
chr10	14022787	14033973	K27ac_merged_peak_3586	0.889231	0.000981668
chr10	14079377	14108774	K27ac_merged_peak_3589	0.67889	0.000105855
chr10	16420478	16430889	K27ac_merged_peak_3615	0.958518	0.00936406
chr10	17112532	17136559	K27ac_merged_peak_3620	1.10284	1.45792e-05
chr10	20210492	20225906	K27ac_merged_peak_3643	0.580631	0.0413676
chr10	22938568	22950346	K27ac_merged_peak_3674	0.730591	0.0452163
chr10	25105692	25115597	K27ac_merged_peak_3696	0.981159	0.00914426
chr10	27476800	27483262	K27ac_merged_peak_3723	1.292	0.000930436
chr10	29602683	29622011	K27ac_merged_peak_3758	-0.69644	0.00334476
chr10	29903865	29930354	K27ac_merged_peak_3767	0.592598	0.00196215
chr10	31266982	31282966	K27ac_merged_peak_3800	0.721904	0.000331362
chr10	31620804	31649838	K27ac_merged_peak_3806	0.484258	0.0228993
chr10	33401379	33454698	K27ac_merged_peak_3825	0.681184	3.51729e-09
chr10	33793191	33799648	K27ac_merged_peak_3837	1.21475	0.00022996
chr10	42383506	42385774	K27ac_merged_peak_3902	-0.537754	0.00104803
chr10	42389301	42394832	K27ac_merged_peak_3904	-0.66567	0.000650336
chr10	42395931	42400857	K27ac_merged_peak_3905	-0.481048	0.000178704
chr10	42599393	42600283	K27ac_merged_peak_3913	-0.642366	0.0169074
chr10	52249422	52291943	K27ac_merged_peak_4003	0.520306	0.000230324
chr10	52587821	52655425	K27ac_merged_peak_4010	0.306676	0.00913149
chr10	59449857	59469950	K27ac_merged_peak_4037	0.872632	5.19039e-05
chr10	64182190	64198753	K27ac_merged_peak_4114	0.568203	0.0407758
chr10	64891345	64912382	K27ac_merged_peak_4121	0.541643	0.0406851
chr10	65451878	65485484	K27ac_merged_peak_4137	0.573627	7.02824e-06
chr10	68079823	68089625	K27ac_merged_peak_4156	-0.745662	0.0282542
chr10	69543270	69601054	K27ac_merged_peak_4170	0.510516	0.000105855
chr10	69840447	69867918	K27ac_merged_peak_4177	0.559094	0.000277557
chr10	69883655	69928462	K27ac_merged_peak_4179	0.500021	0.000176265
chr10	73087682	73116342	K27ac_merged_peak_4234	-0.616926	0.000152651
chr10	74030000	74040518	K27ac_merged_peak_4257	-0.635274	0.0231931
chr10	74869682	74884119	K27ac_merged_peak_4275	0.60626	0.0134379
chr10	74889198	74901602	K27ac_merged_peak_4276	0.894204	0.00325804
chr10	76652405	76669540	K27ac_merged_peak_4314	0.938881	0.000188125
chr10	78915563	78932788	K27ac_merged_peak_4352	0.667389	0.0111193
chr10	79104320	79118541	K27ac_merged_peak_4357	0.815962	0.00825244
chr10	80408927	80412488	K27ac_merged_peak_4385	1.23116	0.0189337
chr10	81941401	81970215	K27ac_merged_peak_4412	0.440981	0.00786702
chr10	82141985	82154908	K27ac_merged_peak_4417	1.21792	0.00204554
chr10	82202457	82238728	K27ac_merged_peak_4419	0.525636	0.00134002
chr10	84147356	84157303	K27ac_merged_peak_4425	0.883509	0.012054
chr10	89343129	89369200	K27ac_merged_peak_4474	-0.55698	0.00889433
chr10	89673424	89744428	K27ac_merged_peak_4484	0.352959	0.0283925
chr10	91018895	91045633	K27ac_merged_peak_4518	0.736842	6.05726e-06
chr10	91049729	91076425	K27ac_merged_peak_4519	0.886943	1.86091e-06
chr10	91082296	91122512	K27ac_merged_peak_4520	0.347577	0.0231931
chr10	91127041	91166387	K27ac_merged_peak_4521	0.761846	2.5856e-06
chr10	93343980	93377331	K27ac_merged_peak_4553	-0.598694	0.00444947
chr10	93963388	93976360	K27ac_merged_peak_4573	1.14755	1.86091e-06
chr10	94041789	94075088	K27ac_merged_peak_4576	0.506418	0.0365073
chr10	96730609	96761583	K27ac_merged_peak_4634	0.54625	0.00920705
chr10	98980182	98993561	K27ac_merged_peak_4668	1.27468	4.0293e-07
chr10	101447305	101461338	K27ac_merged_peak_4716	0.883291	0.00560065
chr10	103112606	103133342	K27ac_merged_peak_4756	0.520366	0.0407131
chr10	105848153	105873332	K27ac_merged_peak_4828	0.646011	0.014341
chr10	111648206	111668638	K27ac_merged_peak_4864	0.754437	0.0147812
chr10	112146702	112184828	K27ac_merged_peak_4880	0.529854	0.000163966
chr10	112251083	112267266	K27ac_merged_peak_4884	0.546156	0.0222958
chr10	112269087	112277823	K27ac_merged_peak_4885	0.986806	0.00460012
chr10	112528272	112594258	K27ac_merged_peak_4892	0.460805	0.00311432
chr10	113966646	113996973	K27ac_merged_peak_4899	-0.479783	0.00199141
chr10	116229116	116292810	K27ac_merged_peak_4940	0.416584	0.00321665
chr10	116293819	116433812	K27ac_merged_peak_4941	0.206965	0.0498204
chr10	123818750	123826361	K27ac_merged_peak_5029	0.979531	0.00820804
chr10	124957727	124965891	K27ac_merged_peak_5052	0.962832	5.0746e-05
chr10	130890776	130910787	K27ac_merged_peak_5103	0.772588	2.56512e-06
chr10	131932103	131942327	K27ac_merged_peak_5120	0.781473	0.00125113
chr11	549257	629372	K27ac_merged_peak_5173	-0.432083	0.00325804
chr11	745402	767655	K27ac_merged_peak_5177	-0.675651	0.0339476
chr11	2878929	2884330	K27ac_merged_peak_5218	1.45719	0.00669793
chr11	3688292	3699817	K27ac_merged_peak_5229	1.34802	3.38415e-08
chr11	8713070	8822538	K27ac_merged_peak_5289	-0.295082	0.0164664
chr11	9582334	9614996	K27ac_merged_peak_5307	0.446731	0.000590957
chr11	9767633	9788856	K27ac_merged_peak_5311	0.56682	0.0180491
chr11	10320576	10356056	K27ac_merged_peak_5320	0.459015	0.00134745
chr11	10367883	10377250	K27ac_merged_peak_5321	0.703006	0.0326473
chr11	10568125	10574712	K27ac_merged_peak_5328	1.0262	0.0427502
chr11	11390928	11484630	K27ac_merged_peak_5338	-0.372824	0.0100337
chr11	12044757	12102368	K27ac_merged_peak_5348	0.414066	0.000410974
chr11	12688174	12755715	K27ac_merged_peak_5361	0.397794	0.00178129
chr11	14628270	14649135	K27ac_merged_peak_5384	0.634217	0.00283988
chr11	18475684	18482505	K27ac_merged_peak_5458	0.968803	0.0321372
chr11	19385129	19434788	K27ac_merged_peak_5476	0.37559	0.0135083
chr11	19439394	19488334	K27ac_merged_peak_5477	0.581855	1.28509e-05
chr11	19509337	19591109	K27ac_merged_peak_5479	0.356629	0.00586917
chr11	19677462	19785210	K27ac_merged_peak_5484	0.365923	0.000279995
chr11	21924361	21937403	K27ac_merged_peak_5501	0.696916	0.0422954
chr11	24749829	24762793	K27ac_merged_peak_5513	0.921662	0.00770061
chr11	25081383	25092824	K27ac_merged_peak_5517	0.755703	0.0158085
chr11	25113195	25120980	K27ac_merged_peak_5518	1.06277	0.0425815
chr11	29278014	29309112	K27ac_merged_peak_5545	0.815599	5.2142e-08
chr11	29310832	29336047	K27ac_merged_peak_5546	1.01366	2.66111e-08
chr11	34163883	34389475	K27ac_merged_peak_5598	0.250997	0.00377534
chr11	34398991	34410558	K27ac_merged_peak_5600	0.985751	0.000828766
chr11	34802195	34817811	K27ac_merged_peak_5613	0.911572	0.00170782
chr11	35309237	35403319	K27ac_merged_peak_5624	0.691634	1.25458e-10
chr11	35408018	35417111	K27ac_merged_peak_5625	0.800022	0.0157044
chr11	36167558	36180750	K27ac_merged_peak_5638	0.734879	0.0044439
chr11	43845260	43860981	K27ac_merged_peak_5676	1.01789	6.45512e-06
chr11	43937434	43949058	K27ac_merged_peak_5679	1.13871	1.47744e-07
chr11	43962504	43970958	K27ac_merged_peak_5680	1.00399	0.0194195
chr11	44628442	44643931	K27ac_merged_peak_5688	0.838662	0.0143219
chr11	46569410	46594094	K27ac_merged_peak_5727	0.672964	0.000166558
chr11	47480088	47576228	K27ac_merged_peak_5754	0.332554	0.0189337
chr11	58419414	58429897	K27ac_merged_peak_5801	1.09699	0.00290101
chr11	59360064	59386802	K27ac_merged_peak_5827	0.585926	0.0151092
chr11	61512049	61646017	K27ac_merged_peak_5853	-0.389007	0.00241356
chr11	66815763	66840437	K27ac_merged_peak_6011	0.548337	0.00121481
chr11	69160150	69178337	K27ac_merged_peak_6069	-0.573939	0.0366843
chr11	69352186	69363707	K27ac_merged_peak_6075	1.28804	8.53735e-05
chr11	71191908	71219276	K27ac_merged_peak_6111	0.654239	0.0383897
chr11	74858366	74921371	K27ac_merged_peak_6185	-0.509696	0.000532069
chr11	75125917	75136660	K27ac_merged_peak_6191	-0.8045	0.0199824
chr11	75466194	75518041	K27ac_merged_peak_6201	-0.353634	0.0316809
chr11	75934532	75941389	K27ac_merged_peak_6208	1.25926	0.0043216
chr11	75975887	75992161	K27ac_merged_peak_6210	0.837193	0.00814393
chr11	76469518	76522496	K27ac_merged_peak_6217	-0.437174	0.0012462
chr11	76764590	76808455	K27ac_merged_peak_6224	-0.394141	0.0162525
chr11	82687076	82694717	K27ac_merged_peak_6267	1.24102	0.000118041
chr11	82742811	82776185	K27ac_merged_peak_6269	0.522588	0.00210715
chr11	83949993	83976630	K27ac_merged_peak_6290	0.72523	4.24503e-06
chr11	84271053	84276758	K27ac_merged_peak_6291	-1.65441	0.00027872
chr11	86444261	86461863	K27ac_merged_peak_6327	0.373592	0.0452163
chr11	93209103	93245501	K27ac_merged_peak_6362	-0.541026	0.00783596
chr11	94178292	94193504	K27ac_merged_peak_6377	1.0127	1.49441e-05
chr11	102315206	102372082	K27ac_merged_peak_6447	-0.341135	0.00533541
chr11	108207359	108218297	K27ac_merged_peak_6477	1.16136	5.48771e-05
chr11	111467277	111684119	K27ac_merged_peak_6515	0.403712	8.09603e-08
chr11	111827735	111836551	K27ac_merged_peak_6521	1.45439	2.52567e-06
chr11	112021548	112051658	K27ac_merged_peak_6531	0.637119	4.63234e-06
chr11	112432563	112437457	K27ac_merged_peak_6538	1.06003	0.0475214
chr11	113902509	113916641	K27ac_merged_peak_6548	0.675546	0.0151131
chr11	115414366	115430273	K27ac_merged_peak_6564	0.913224	2.59044e-05
chr11	115446199	115469663	K27ac_merged_peak_6566	1.51475	3.02867e-14
chr11	118105598	118125992	K27ac_merged_peak_6600	0.507831	0.0414668
chr11	120477598	120489640	K27ac_merged_peak_6656	1.10192	0.000368822
chr11	120924577	120965812	K27ac_merged_peak_6661	0.489145	0.0240934
chr11	120966374	120973096	K27ac_merged_peak_6662	1.31533	0.00930308
chr11	121216553	121231087	K27ac_merged_peak_6668	1.05905	4.66283e-05
chr11	121312422	121508034	K27ac_merged_peak_6673	0.339419	4.95003e-05
chr11	127507205	127526802	K27ac_merged_peak_6741	0.558892	0.0107174
chr11	127884986	127902812	K27ac_merged_peak_6744	0.70093	0.000225809
chr11	128316412	128381376	K27ac_merged_peak_6751	0.343295	0.006229
chr11	129825638	129841083	K27ac_merged_peak_6781	0.56957	0.024324
chr11	130044153	130054691	K27ac_merged_peak_6787	0.688935	0.0174163
chr11	134263070	134277934	K27ac_merged_peak_6813	0.985775	0.00206477
chr12	279962	292082	K27ac_merged_peak_6821	1.00743	0.00323311
chr12	1625938	1631718	K27ac_merged_peak_6854	0.985064	0.0366843
chr12	3066449	3070780	K27ac_merged_peak_6874	-1.22193	0.0231672
chr12	6632975	6653872	K27ac_merged_peak_6911	-0.554111	0.0218788
chr12	7030572	7127652	K27ac_merged_peak_6927	-0.334621	0.0189337
chr12	7662795	7668113	K27ac_merged_peak_6938	0.755647	0.0319452
chr12	7730348	7741896	K27ac_merged_peak_6939	1.6211	4.75438e-12
chr12	9980043	9986000	K27ac_merged_peak_6960	1.25123	0.00822849
chr12	12520266	12561981	K27ac_merged_peak_6999	0.516515	0.000124637
chr12	12576920	12718414	K27ac_merged_peak_7002	0.497754	6.7684e-09
chr12	12953035	12962664	K27ac_merged_peak_7008	1.21567	0.000208817
chr12	13958153	13971201	K27ac_merged_peak_7029	1.37351	0.0426761
chr12	14360299	14379162	K27ac_merged_peak_7033	0.769667	0.0222958
chr12	15916119	15965080	K27ac_merged_peak_7052	0.499636	0.000989958
chr12	18576482	18601022	K27ac_merged_peak_7079	0.67856	0.012298
chr12	18611586	18628747	K27ac_merged_peak_7080	0.958691	0.000866721
chr12	19280714	19408141	K27ac_merged_peak_7090	0.443463	0.000152651
chr12	20147657	20159690	K27ac_merged_peak_7106	-0.861678	0.00330999
chr12	21261021	21276214	K27ac_merged_peak_7117	-0.722166	0.0434909
chr12	24157597	24246004	K27ac_merged_peak_7156	0.314057	0.0290441
chr12	27086072	27102257	K27ac_merged_peak_7207	0.594953	0.0306721
chr12	27422996	27510620	K27ac_merged_peak_7215	0.282253	0.041211
chr12	31896239	31910820	K27ac_merged_peak_7277	0.775478	0.00134002
chr12	33009392	33063602	K27ac_merged_peak_7300	-0.481511	0.00484555
chr12	39264719	39302510	K27ac_merged_peak_7319	0.419101	0.0043216
chr12	39624177	39637309	K27ac_merged_peak_7320	0.732037	0.0434909
chr12	39750823	39770026	K27ac_merged_peak_7322	0.621956	0.03018
chr12	40215428	40230215	K27ac_merged_peak_7327	0.459889	0.04302
chr12	45590317	45630892	K27ac_merged_peak_7355	0.33154	0.0224681
chr12	47392885	47403883	K27ac_merged_peak_7393	0.659043	0.0460379
chr12	47423366	47434796	K27ac_merged_peak_7395	0.929912	0.00263199
chr12	50322743	50326785	K27ac_merged_peak_7461	1.28009	0.0149215
chr12	50628093	50649166	K27ac_merged_peak_7473	0.774771	0.00361306
chr12	52272950	52292947	K27ac_merged_peak_7518	1.24117	5.2142e-08
chr12	53549467	53595738	K27ac_merged_peak_7549	-0.461347	0.028106
chr12	53760995	53794504	K27ac_merged_peak_7557	0.43437	0.0203486
chr12	54197684	54205844	K27ac_merged_peak_7572	0.934047	0.0432045
chr12	54761750	54834366	K27ac_merged_peak_7585	0.297155	0.0499997
chr12	55325512	55335829	K27ac_merged_peak_7591	-0.624877	0.0456288
chr12	57602031	57659436	K27ac_merged_peak_7636	-0.403466	0.0255427
chr12	63358735	63363820	K27ac_merged_peak_7700	1.43722	0.00204554
chr12	65008809	65032025	K27ac_merged_peak_7718	0.535604	0.0232411
chr12	67817576	67837442	K27ac_merged_peak_7744	0.737636	0.0144586
chr12	69354015	69380361	K27ac_merged_peak_7770	0.640963	0.00280871
chr12	71547181	71561609	K27ac_merged_peak_7803	0.454149	0.0453597
chr12	72230504	72250160	K27ac_merged_peak_7811	0.786153	0.00167901
chr12	73613233	73624678	K27ac_merged_peak_7820	0.709282	0.00267885
chr12	76247288	76272495	K27ac_merged_peak_7848	0.600407	0.00212369
chr12	76834596	76865016	K27ac_merged_peak_7864	0.523339	0.0145926
chr12	79842968	79853357	K27ac_merged_peak_7883	1.1065	0.00169585
chr12	79908289	79933106	K27ac_merged_peak_7884	0.4554	0.041064
chr12	94006139	94024333	K27ac_merged_peak_8013	0.869942	0.000136293
chr12	96175531	96210960	K27ac_merged_peak_8055	0.333678	0.0225257
chr12	101791048	101804949	K27ac_merged_peak_8112	1.05742	1.25236e-06
chr12	102100306	102122261	K27ac_merged_peak_8118	0.716096	0.0288413
chr12	104666018	104716460	K27ac_merged_peak_8167	-0.374145	0.0110501
chr12	105312337	105361382	K27ac_merged_peak_8176	0.413086	0.00482437
chr12	105707554	105718995	K27ac_merged_peak_8184	-0.843698	0.00797386
chr12	106671946	106704606	K27ac_merged_peak_8196	0.399896	0.0381542
chr12	108997155	109014253	K27ac_merged_peak_8230	0.873539	0.0255259
chr12	109177141	109256064	K27ac_merged_peak_8236	-0.37551	0.00554882
chr12	109534641	109719578	K27ac_merged_peak_8243	-0.338236	0.000743199
chr12	115747209	115756488	K27ac_merged_peak_8362	0.996854	0.00989827
chr12	115768679	115797029	K27ac_merged_peak_8364	0.704001	0.000112328
chr12	120552188	120563179	K27ac_merged_peak_8433	-0.6715	0.0256916
chr12	121277702	121306143	K27ac_merged_peak_8459	0.761175	4.46747e-05
chr12	123409651	123438426	K27ac_merged_peak_8509	0.570769	0.00673693
chr12	124140935	124147512	K27ac_merged_peak_8527	1.24961	0.00131803
chr12	125249578	125374915	K27ac_merged_peak_8547	-0.255815	0.0383946
chr12	125397985	125415660	K27ac_merged_peak_8549	0.449145	0.00933809
chr12	126964377	126975239	K27ac_merged_peak_8565	0.931069	0.0365466
chr12	129291998	129311316	K27ac_merged_peak_8581	0.818417	1.28723e-06
chr12	129381163	129409660	K27ac_merged_peak_8585	0.73937	2.94618e-05
chr13	21383795	21407229	K27ac_merged_peak_8657	0.460544	0.0424616
chr13	24715715	24763534	K27ac_merged_peak_8694	0.402867	0.00139346
chr13	27682730	27770810	K27ac_merged_peak_8716	0.472519	4.95003e-05
chr13	29688079	29720049	K27ac_merged_peak_8753	0.55379	0.000121195
chr13	30928414	30941782	K27ac_merged_peak_8768	-0.802271	0.0431284
chr13	34095362	34104746	K27ac_merged_peak_8822	-0.99197	0.0328559
chr13	36463487	36472099	K27ac_merged_peak_8840	0.867701	0.0290604
chr13	36494878	36507752	K27ac_merged_peak_8841	0.875702	0.0145316
chr13	42392626	42404854	K27ac_merged_peak_8894	0.781695	0.0291098
chr13	44789955	44813748	K27ac_merged_peak_8934	0.583888	0.0149789
chr13	44865411	44901642	K27ac_merged_peak_8936	0.533049	1.56845e-05
chr13	45732565	45746196	K27ac_merged_peak_8950	0.911893	0.00264113
chr13	45749893	45759526	K27ac_merged_peak_8951	0.908673	0.00644001
chr13	45764626	45786360	K27ac_merged_peak_8952	0.805259	6.7068e-05
chr13	45932704	45947608	K27ac_merged_peak_8961	0.753084	0.00598696
chr13	46069794	46081710	K27ac_merged_peak_8966	0.923694	0.000252123
chr13	47991982	48003727	K27ac_merged_peak_8984	0.689606	0.0422141
chr13	50792577	50808013	K27ac_merged_peak_9044	1.10661	7.10297e-07
chr13	50808911	50828376	K27ac_merged_peak_9045	0.68755	0.00432634
chr13	50839967	50853688	K27ac_merged_peak_9046	0.749453	0.034518
chr13	50924823	50944693	K27ac_merged_peak_9049	0.704773	3.98236e-05
chr13	67563373	67571004	K27ac_merged_peak_9122	-1.15293	0.0268073
chr13	76274857	76282482	K27ac_merged_peak_9188	1.12892	0.000664878
chr13	81042229	81056970	K27ac_merged_peak_9228	0.677544	0.00175892
chr13	99979732	100001583	K27ac_merged_peak_9346	0.765429	0.00539045
chr13	100294195	100319460	K27ac_merged_peak_9353	0.476732	0.0122504
chr13	100735629	100771447	K27ac_merged_peak_9366	0.37373	0.0293019
chr13	100972930	100980954	K27ac_merged_peak_9371	0.938488	0.0375496
chr13	100997231	101027225	K27ac_merged_peak_9372	0.684086	0.000481582
chr13	101028423	101059191	K27ac_merged_peak_9373	0.611008	0.00117893
chr13	102832727	102855097	K27ac_merged_peak_9394	0.431268	0.0248712
chr13	109560148	109584790	K27ac_merged_peak_9423	0.539908	0.00304301
chr13	109594738	109620909	K27ac_merged_peak_9424	0.578749	0.00465878
chr13	109630625	109636334	K27ac_merged_peak_9425	1.04001	0.00750223
chr13	109901785	109914739	K27ac_merged_peak_9427	0.920103	0.00164497
chr13	111060056	111069757	K27ac_merged_peak_9456	0.940897	0.00173881
chr13	111154919	111167539	K27ac_merged_peak_9457	-0.81299	0.0155905
chr13	111171340	111218760	K27ac_merged_peak_9458	-0.522966	0.00184339
chr13	111592841	111598370	K27ac_merged_peak_9468	1.30192	0.0144586
chr14	22377497	22394927	K27ac_merged_peak_9557	0.533444	0.0250476
chr14	22799415	22811811	K27ac_merged_peak_9559	0.939186	0.000313271
chr14	22836618	22861764	K27ac_merged_peak_9560	0.519212	0.0190412
chr14	24066432	24103004	K27ac_merged_peak_9588	0.972442	8.81305e-13
chr14	24807559	24826783	K27ac_merged_peak_9605	0.937799	7.52468e-05
chr14	25273551	25335445	K27ac_merged_peak_9611	0.542108	2.79056e-06
chr14	26990738	27001689	K27ac_merged_peak_9616	0.959111	0.0139753
chr14	27227513	27252375	K27ac_merged_peak_9618	0.509798	0.0317693
chr14	27299773	27317804	K27ac_merged_peak_9620	0.528299	0.0153571
chr14	31549765	31582744	K27ac_merged_peak_9641	0.592188	0.0203465
chr14	31804702	31814030	K27ac_merged_peak_9650	1.01495	0.00140377
chr14	32403590	32409788	K27ac_merged_peak_9659	1.12174	0.00233652
chr14	34888224	34898921	K27ac_merged_peak_9689	1.05726	0.0016847
chr14	35139147	35199671	K27ac_merged_peak_9696	0.615945	0.0263361
chr14	35622540	35643560	K27ac_merged_peak_9710	0.633265	0.00325098
chr14	35664219	35720555	K27ac_merged_peak_9712	0.429828	0.041064
chr14	38857831	38866624	K27ac_merged_peak_9753	0.831141	0.0370785
chr14	50478564	50493414	K27ac_merged_peak_9807	0.642544	0.0275357
chr14	50495531	50539976	K27ac_merged_peak_9808	0.369527	0.00584942
chr14	51801326	51814230	K27ac_merged_peak_9835	0.78381	0.00362234
chr14	53324117	53421511	K27ac_merged_peak_9852	0.281839	0.043254
chr14	55099510	55219179	K27ac_merged_peak_9880	0.327263	0.00240659
chr14	55831121	55859656	K27ac_merged_peak_9892	0.764028	0.00505674
chr14	57523721	57533955	K27ac_merged_peak_9903	0.743133	0.0146769
chr14	59724812	59789638	K27ac_merged_peak_9925	0.319629	0.0192021
chr14	61923979	61968059	K27ac_merged_peak_9963	0.378512	0.0175105
chr14	63918307	63978409	K27ac_merged_peak_9975	0.439434	0.00168114
chr14	65163438	65217237	K27ac_merged_peak_9995	0.269036	0.0477873
chr14	65545975	65550509	K27ac_merged_peak_10008	1.36851	0.0120782
chr14	66841066	66850320	K27ac_merged_peak_10016	-1.10767	0.0120782
chr14	68904277	69048279	K27ac_merged_peak_10065	-0.415097	7.20808e-07
chr14	73686064	73709371	K27ac_merged_peak_10166	0.80812	1.35533e-05
chr14	76019831	76033229	K27ac_merged_peak_10221	0.838038	0.00586917
chr14	76664466	76676952	K27ac_merged_peak_10232	0.795695	0.0351896
chr14	77763013	77808127	K27ac_merged_peak_10249	0.371518	0.00598696
chr14	81864342	81870687	K27ac_merged_peak_10285	0.945225	0.0345837
chr14	86027985	86042186	K27ac_merged_peak_10290	0.966439	0.00104148
chr14	90103120	90122562	K27ac_merged_peak_10336	0.787875	1.61869e-05
chr14	92442208	92458107	K27ac_merged_peak_10380	0.670049	0.022029
chr14	96554487	96579298	K27ac_merged_peak_10432	0.804806	1.41861e-06
chr15	34528135	34538269	K27ac_merged_peak_10651	1.11585	0.000161333
chr15	35590209	35608469	K27ac_merged_peak_10667	0.472709	0.0436299
chr15	37507546	37518034	K27ac_merged_peak_10691	0.653559	0.00735537
chr15	37580649	37586517	K27ac_merged_peak_10694	1.10424	0.026893
chr15	38048639	38091984	K27ac_merged_peak_10696	0.502301	0.000163038
chr15	39644099	39662132	K27ac_merged_peak_10709	0.619904	0.0031498
chr15	41239692	41253626	K27ac_merged_peak_10750	-0.886297	0.00499162
chr15	50985859	51023081	K27ac_merged_peak_10887	0.468277	0.0374866
chr15	51145247	51154915	K27ac_merged_peak_10890	-0.892172	0.0390186
chr15	53037386	53104916	K27ac_merged_peak_10933	-0.311908	0.0336054
chr15	53725071	53757654	K27ac_merged_peak_10942	-0.649183	0.000118337
chr15	53875570	53886308	K27ac_merged_peak_10946	-0.931728	0.0472013
chr15	57291749	57338619	K27ac_merged_peak_10988	0.541279	0.00164661
chr15	57659034	57856095	K27ac_merged_peak_10994	0.290272	0.00190047
chr15	58640252	58658758	K27ac_merged_peak_11008	0.701652	0.0199824
chr15	59450137	59511399	K27ac_merged_peak_11024	0.537407	0.0127058
chr15	60543657	60552424	K27ac_merged_peak_11041	1.51498	1.03197e-06
chr15	60933316	60994273	K27ac_merged_peak_11048	0.67455	7.6859e-06
chr15	61663290	61701038	K27ac_merged_peak_11065	0.568477	0.00120701
chr15	64294281	64324809	K27ac_merged_peak_11120	0.797239	1.12646e-08
chr15	65369259	65394371	K27ac_merged_peak_11159	-0.465469	0.0483721
chr15	66989741	67072982	K27ac_merged_peak_11189	-0.43333	0.000676291
chr15	67170735	67181297	K27ac_merged_peak_11193	-0.941181	0.011393
chr15	71116041	71129477	K27ac_merged_peak_11266	-0.754442	0.00783596
chr15	71542417	71551061	K27ac_merged_peak_11273	0.999882	0.0419837
chr15	71665352	71680828	K27ac_merged_peak_11276	0.656324	0.034518
chr15	74812312	74824651	K27ac_merged_peak_11331	0.83636	0.00275875
chr15	77349021	77366183	K27ac_merged_peak_11390	0.518353	0.0174163
chr15	80348393	80411031	K27ac_merged_peak_11432	0.374486	0.0321372
chr15	81241306	81250480	K27ac_merged_peak_11449	1.26529	0.00296719
chr15	82412290	82444166	K27ac_merged_peak_11467	0.654109	2.74096e-05
chr15	85942905	85977413	K27ac_merged_peak_11510	0.771709	1.20049e-06
chr15	89161964	89204489	K27ac_merged_peak_11531	0.704563	4.4956e-08
chr15	90538013	90610052	K27ac_merged_peak_11565	0.494634	0.000305701
chr15	92480479	92494086	K27ac_merged_peak_11603	1.03456	8.43179e-05
chr15	93423155	93489349	K27ac_merged_peak_11621	0.368621	0.00101207
chr15	100230982	100255800	K27ac_merged_peak_11674	0.423686	0.0240934
chr15	101251478	101259344	K27ac_merged_peak_11688	1.18589	0.000354967
chr15	101260333	101269471	K27ac_merged_peak_11689	0.931456	0.000484807
chr16	1336172	1366197	K27ac_merged_peak_11738	0.565034	0.000318431
chr16	1812418	1890325	K27ac_merged_peak_11751	-0.334065	0.0442783
chr16	1913629	1940373	K27ac_merged_peak_11752	0.459912	0.0328945
chr16	2068160	2100415	K27ac_merged_peak_11759	-0.560307	0.00377534
chr16	2193474	2214554	K27ac_merged_peak_11764	-0.434237	0.048934
chr16	9558059	9567045	K27ac_merged_peak_11882	0.791829	0.0227277
chr16	10818298	10851484	K27ac_merged_peak_11900	0.58787	0.00260932
chr16	11586658	11596246	K27ac_merged_peak_11917	0.811805	0.0104796
chr16	11624114	11640227	K27ac_merged_peak_11918	1.24788	8.9647e-08
chr16	12269068	12284527	K27ac_merged_peak_11931	-0.781646	0.0194666
chr16	12657881	12680602	K27ac_merged_peak_11938	0.700275	0.00241356
chr16	12691757	12762068	K27ac_merged_peak_11939	0.478726	1.50936e-06
chr16	12762691	12804447	K27ac_merged_peak_11940	0.555492	0.00928177
chr16	15526066	15619708	K27ac_merged_peak_11989	0.438943	3.37737e-05
chr16	15967725	15984194	K27ac_merged_peak_11998	-0.798653	0.0288563
chr16	17263227	17271443	K27ac_merged_peak_12005	-1.34575	0.000299429
chr16	22352868	22388782	K27ac_merged_peak_12078	0.485619	0.00137044
chr16	23088926	23105714	K27ac_merged_peak_12081	0.729732	0.0290441
chr16	23461613	23497477	K27ac_merged_peak_12086	0.519885	0.0293033
chr16	23503440	23524560	K27ac_merged_peak_12087	0.553946	0.0147772
chr16	23544999	23552627	K27ac_merged_peak_12088	-0.795908	0.0436725
chr16	25641194	25651622	K27ac_merged_peak_12109	0.724275	0.040901
chr16	30405062	30433219	K27ac_merged_peak_12174	0.544002	0.00479504
chr16	48563979	48650043	K27ac_merged_peak_12276	0.502545	0.000119896
chr16	50198554	50255124	K27ac_merged_peak_12293	-0.351728	0.0461694
chr16	50768839	50788149	K27ac_merged_peak_12307	0.595578	0.00422552
chr16	52436835	52449009	K27ac_merged_peak_12338	0.608318	0.0345741
chr16	52571626	52604529	K27ac_merged_peak_12341	0.440537	0.0428963
chr16	56222644	56239527	K27ac_merged_peak_12379	-0.792937	0.00148234
chr16	56242263	56252738	K27ac_merged_peak_12380	-1.13401	0.00029011
chr16	56255806	56261225	K27ac_merged_peak_12381	-1.50959	0.00112644
chr16	56261998	56356755	K27ac_merged_peak_12382	-0.656435	5.16004e-06
chr16	57008794	57039881	K27ac_merged_peak_12398	0.685096	0.000785212
chr16	58052222	58071169	K27ac_merged_peak_12427	-0.73934	0.00105838
chr16	58488355	58500537	K27ac_merged_peak_12435	1.47028	7.66008e-07
chr16	67692670	67798433	K27ac_merged_peak_12497	0.354828	0.00307919
chr16	67886155	67921116	K27ac_merged_peak_12501	0.611498	0.00560596
chr16	69219968	69231144	K27ac_merged_peak_12539	-0.783213	0.0347277
chr16	70310872	70325512	K27ac_merged_peak_12563	-0.72644	0.0434909
chr16	71596815	71636506	K27ac_merged_peak_12585	0.341533	0.0199824
chr16	72041027	72072494	K27ac_merged_peak_12600	-0.571696	0.00437225
chr16	73755339	73781566	K27ac_merged_peak_12622	1.11042	2.3307e-06
chr16	75403114	75444281	K27ac_merged_peak_12644	0.483504	0.00372747
chr16	75595355	75606985	K27ac_merged_peak_12649	0.860898	0.00460012
chr16	81611787	81715636	K27ac_merged_peak_12734	0.327398	0.0180491
chr16	85000274	85049385	K27ac_merged_peak_12786	0.37481	0.00586917
chr16	85967802	85984789	K27ac_merged_peak_12819	0.578996	0.0456535
chr16	87444652	87543564	K27ac_merged_peak_12828	0.486763	3.53525e-05
chr16	87810599	87829758	K27ac_merged_peak_12834	-0.681394	0.00560065
chr16	87861893	87892972	K27ac_merged_peak_12836	-0.498012	0.00432634
chr16	88011797	88022447	K27ac_merged_peak_12840	1.01936	0.0019612
chr17	2543970	2556124	K27ac_merged_peak_12972	1.16403	0.00032488
chr17	4670782	4678474	K27ac_merged_peak_13016	0.822538	0.0171623
chr17	5194288	5219840	K27ac_merged_peak_13033	0.960421	0.000294423
chr17	8011972	8033083	K27ac_merged_peak_13095	0.563614	0.0428963
chr17	8036656	8068606	K27ac_merged_peak_13096	0.509207	0.00263199
chr17	17774032	17790779	K27ac_merged_peak_13241	-0.811381	0.0352686
chr17	19651346	19657472	K27ac_merged_peak_13275	-1.01708	0.0215496
chr17	26657602	26700924	K27ac_merged_peak_13338	-0.66266	4.36823e-05
chr17	26721784	26735459	K27ac_merged_peak_13340	-0.818213	0.0166312
chr17	27576587	27599602	K27ac_merged_peak_13366	0.522267	0.04681
chr17	27738855	27780110	K27ac_merged_peak_13372	0.523877	0.0316809
chr17	27881013	27912123	K27ac_merged_peak_13374	-0.479094	0.046264
chr17	28692554	28700686	K27ac_merged_peak_13393	0.923737	0.00984231
chr17	37023686	37080515	K27ac_merged_peak_13528	-0.448495	0.00585538
chr17	38451257	38520992	K27ac_merged_peak_13567	-0.265249	0.0426761
chr17	38685370	38718239	K27ac_merged_peak_13572	-0.678707	1.46717e-05
chr17	39054628	39082527	K27ac_merged_peak_13582	0.727012	3.13779e-05
chr17	39893840	39898178	K27ac_merged_peak_13590	1.12826	0.0425815
chr17	43043410	43061595	K27ac_merged_peak_13695	0.893162	9.59262e-07
chr17	48702592	48788301	K27ac_merged_peak_13815	-0.450667	6.68404e-06
chr17	48959286	49067974	K27ac_merged_peak_13823	-0.413963	0.00144959
chr17	49182908	49218273	K27ac_merged_peak_13827	0.633593	0.000137196
chr17	53763865	53789136	K27ac_merged_peak_13867	0.782048	1.12652e-05
chr17	55533190	55544080	K27ac_merged_peak_13892	1.21842	1.39487e-05
chr17	63001297	63106080	K27ac_merged_peak_14024	0.250026	0.0265976
chr17	63113111	63156944	K27ac_merged_peak_14025	0.500511	0.00140473
chr17	64318461	64373070	K27ac_merged_peak_14039	0.456622	0.00411251
chr17	64374588	64523736	K27ac_merged_peak_14040	0.238561	0.0342557
chr17	66465166	66474142	K27ac_merged_peak_14074	0.956731	0.0288413
chr17	72739296	72779193	K27ac_merged_peak_14158	-0.392241	0.0199824
chr17	76684096	76790844	K27ac_merged_peak_14261	0.265226	0.033184
chr17	80271695	80317517	K27ac_merged_peak_14352	0.655801	0.000172213
chr18	106803	109684	K27ac_merged_peak_14374	-0.446112	0.0432775
chr18	3109554	3124898	K27ac_merged_peak_14404	0.709296	0.000731221
chr18	3206088	3286035	K27ac_merged_peak_14410	0.358383	0.000473116
chr18	6345664	6378117	K27ac_merged_peak_14445	0.670001	5.65202e-06
chr18	7868240	7903300	K27ac_merged_peak_14457	0.433559	0.0205824
chr18	7904664	7965997	K27ac_merged_peak_14458	0.401825	0.00263199
chr18	8104090	8129389	K27ac_merged_peak_14463	0.530863	0.00304921
chr18	10999682	11022703	K27ac_merged_peak_14491	0.793688	0.000339244
chr18	11107765	11127487	K27ac_merged_peak_14495	-0.719166	0.000912991
chr18	18511347	18513265	K27ac_merged_peak_14555	-0.666426	0.0355724
chr18	18515936	18520521	K27ac_merged_peak_14556	-0.468962	1.32626e-06
chr18	19013430	19045868	K27ac_merged_peak_14568	0.49271	0.00860912
chr18	19242338	19270087	K27ac_merged_peak_14575	0.549471	0.00107534
chr18	20244945	20299747	K27ac_merged_peak_14611	0.570562	6.3351e-07
chr18	20373501	20385647	K27ac_merged_peak_14618	0.899704	0.0413638
chr18	20550290	20567261	K27ac_merged_peak_14624	0.795678	7.68331e-05
chr18	20856904	20865933	K27ac_merged_peak_14633	0.790893	0.010871
chr18	24955397	24961483	K27ac_merged_peak_14684	0.951893	0.0456535
chr18	28674206	28690309	K27ac_merged_peak_14698	0.508846	0.0392496
chr18	29064662	29102730	K27ac_merged_peak_14708	0.557556	0.00147353
chr18	29917962	29975359	K27ac_merged_peak_14730	0.627466	6.72684e-08
chr18	31394775	31405806	K27ac_merged_peak_14746	0.713871	0.0192021
chr18	32555175	32564405	K27ac_merged_peak_14761	0.623065	0.0347698
chr18	39987830	39999211	K27ac_merged_peak_14815	0.672471	0.0262635
chr18	40089363	40111482	K27ac_merged_peak_14817	0.573127	0.0379579
chr18	46012018	46022309	K27ac_merged_peak_14868	-0.700814	0.0480304
chr18	46063803	46086132	K27ac_merged_peak_14869	-0.441957	0.0438981
chr18	46437802	46485768	K27ac_merged_peak_14879	-0.310922	0.0268073
chr18	47487855	47510520	K27ac_merged_peak_14908	0.661773	0.00760589
chr18	47595328	47611110	K27ac_merged_peak_14911	0.653766	0.0190983
chr18	47616469	47646504	K27ac_merged_peak_14912	1.00078	5.19268e-11
chr18	47650018	47673782	K27ac_merged_peak_14913	0.655923	0.00833296
chr18	47714191	47723852	K27ac_merged_peak_14915	1.40294	3.63352e-08
chr18	51672073	51680722	K27ac_merged_peak_14945	0.953822	0.000980022
chr18	52271880	52285039	K27ac_merged_peak_14954	1.09124	5.16004e-06
chr18	52428895	52451180	K27ac_merged_peak_14955	0.745343	1.28723e-06
chr18	52457786	52477794	K27ac_merged_peak_14956	0.714073	0.0133862
chr18	52610112	52620505	K27ac_merged_peak_14961	0.709988	0.036671
chr18	55429615	55492315	K27ac_merged_peak_14997	0.381132	0.000832653
chr18	55841470	55915095	K27ac_merged_peak_15008	0.368547	0.0072593
chr18	56060360	56126702	K27ac_merged_peak_15013	-0.308657	0.0166664
chr18	57174178	57186788	K27ac_merged_peak_15036	0.954303	0.00154149
chr18	60562327	60573037	K27ac_merged_peak_15067	1.19858	0.00148831
chr18	61917244	61926260	K27ac_merged_peak_15091	-1.18594	0.00072096
chr18	61936183	61956624	K27ac_merged_peak_15092	-0.956779	6.74369e-05
chr18	70980000	70991465	K27ac_merged_peak_15137	0.673043	0.00444965
chr18	74754646	74860197	K27ac_merged_peak_15183	0.289386	0.0213974
chr18	76914050	76921077	K27ac_merged_peak_15193	1.00746	0.0453597
chr18	77681939	77716639	K27ac_merged_peak_15199	-0.407024	0.0422953
chr19	1351055	1388663	K27ac_merged_peak_15247	-0.483816	0.0389279
chr19	2773882	2823406	K27ac_merged_peak_15291	0.44814	0.00609359
chr19	4515386	4527649	K27ac_merged_peak_15347	-0.696072	0.0407758
chr19	7128905	7156508	K27ac_merged_peak_15412	0.418046	0.0447628
chr19	7157623	7274534	K27ac_merged_peak_15413	0.356915	0.00288587
chr19	8670503	8678680	K27ac_merged_peak_15453	-1.10618	0.00793853
chr19	8737288	8751977	K27ac_merged_peak_15454	-0.927044	0.00139212
chr19	10850711	10893635	K27ac_merged_peak_15502	-0.626078	0.0047704
chr19	11233358	11317942	K27ac_merged_peak_15515	-0.309716	0.0426553
chr19	13903727	13912495	K27ac_merged_peak_15590	0.563516	0.0472008
chr19	13940760	13977665	K27ac_merged_peak_15592	0.408176	0.00586917
chr19	14603390	14633920	K27ac_merged_peak_15610	-0.507231	0.0178566
chr19	17334767	17361267	K27ac_merged_peak_15671	-0.534468	0.0124484
chr19	18117512	18172036	K27ac_merged_peak_15694	0.548629	6.45512e-06
chr19	27731843	27740239	K27ac_merged_peak_15767	-0.490266	1.97653e-06
chr19	33759567	33809340	K27ac_merged_peak_15810	-0.319192	0.0452161
chr19	34713256	34730382	K27ac_merged_peak_15820	1.01157	6.9236e-05
chr19	37954863	37961327	K27ac_merged_peak_15894	-1.1237	0.0248891
chr19	39434570	39453668	K27ac_merged_peak_15928	-0.857683	0.0336208
chr19	45388732	45466265	K27ac_merged_peak_16060	-0.346848	0.00968093
chr19	45941102	45984905	K27ac_merged_peak_16078	0.388792	0.00877175
chr19	47591890	47620975	K27ac_merged_peak_16126	0.453256	0.00445381
chr19	49238280	49290028	K27ac_merged_peak_16173	0.312986	0.0484185
chr19	49418775	49438550	K27ac_merged_peak_16180	0.828184	0.00385452
chr2	7012209	7023475	K27ac_merged_peak_16407	1.414	0.000123952
chr2	8440592	8476666	K27ac_merged_peak_16422	0.403715	0.0361609
chr2	10706617	10741075	K27ac_merged_peak_16467	0.926834	8.46725e-10
chr2	11339242	11346567	K27ac_merged_peak_16477	1.08577	0.0164184
chr2	11362804	11404819	K27ac_merged_peak_16479	0.718073	0.000990924
chr2	15916160	15927943	K27ac_merged_peak_16517	-0.803606	0.0140857
chr2	20363905	20432269	K27ac_merged_peak_16579	-0.269035	0.0345741
chr2	20588915	20607102	K27ac_merged_peak_16583	0.56151	0.0336054
chr2	23339277	23361891	K27ac_merged_peak_16611	-0.496335	0.0214667
chr2	23460066	23478815	K27ac_merged_peak_16613	-0.81539	0.000528656
chr2	24488186	24499056	K27ac_merged_peak_16636	0.87282	0.000897691
chr2	24524849	24529887	K27ac_merged_peak_16637	1.19212	0.0283925
chr2	26228601	26245826	K27ac_merged_peak_16672	0.624676	0.00182473
chr2	27302433	27331294	K27ac_merged_peak_16693	-0.499899	0.0416514
chr2	27647499	27660188	K27ac_merged_peak_16708	0.658181	0.0199824
chr2	28655163	28676079	K27ac_merged_peak_16737	0.751857	0.00131803
chr2	28799536	28812831	K27ac_merged_peak_16739	0.746488	0.00394563
chr2	28837847	28869413	K27ac_merged_peak_16741	0.676966	7.02824e-06
chr2	28931324	28944762	K27ac_merged_peak_16745	0.814704	0.0133963
chr2	31539066	31613681	K27ac_merged_peak_16774	0.495559	0.00167901
chr2	31740129	31800831	K27ac_merged_peak_16778	0.323901	0.02215
chr2	31949115	31958043	K27ac_merged_peak_16782	0.707136	0.023327
chr2	32175183	32238886	K27ac_merged_peak_16786	0.468508	0.0012462
chr2	33271329	33339864	K27ac_merged_peak_16805	0.353311	0.0149789
chr2	39217091	39236983	K27ac_merged_peak_16879	0.718931	0.00240659
chr2	39656715	39686327	K27ac_merged_peak_16884	0.590062	0.00996211
chr2	39690526	39757564	K27ac_merged_peak_16885	0.560668	2.6983e-06
chr2	42072095	42089928	K27ac_merged_peak_16900	0.658662	0.0130475
chr2	42116848	42127168	K27ac_merged_peak_16903	0.992225	0.00073043
chr2	42548850	42590793	K27ac_merged_peak_16912	0.45993	0.0024666
chr2	43473877	43524034	K27ac_merged_peak_16936	0.427581	0.0306753
chr2	44501156	44525385	K27ac_merged_peak_16965	-0.511256	0.0124484
chr2	45478690	45513525	K27ac_merged_peak_16981	-0.375313	0.0313383
chr2	47178024	47202343	K27ac_merged_peak_17024	-0.486494	0.0425815
chr2	47432359	47440838	K27ac_merged_peak_17033	-0.922612	0.0416514
chr2	48422059	48459673	K27ac_merged_peak_17046	0.798834	2.24562e-05
chr2	48462455	48486485	K27ac_merged_peak_17047	0.871309	2.32351e-06
chr2	48489827	48519344	K27ac_merged_peak_17048	1.65451	0.00783665
chr2	48532252	48599312	K27ac_merged_peak_17050	0.467055	0.00088349
chr2	54211060	54217725	K27ac_merged_peak_17088	1.29049	0.00146574
chr2	55802641	55860867	K27ac_merged_peak_17116	0.464294	0.00203824
chr2	56671473	56680089	K27ac_merged_peak_17125	-0.809748	0.0133379
chr2	61432846	61441314	K27ac_merged_peak_17152	0.773295	0.0120782
chr2	61926018	61943521	K27ac_merged_peak_17163	1.02109	9.64168e-05
chr2	63914907	63929607	K27ac_merged_peak_17193	-0.543329	0.0357264
chr2	64805853	64841745	K27ac_merged_peak_17220	0.372275	0.0434909
chr2	64897758	64968063	K27ac_merged_peak_17222	0.460008	7.0832e-05
chr2	65197592	65222630	K27ac_merged_peak_17232	0.493153	0.0188279
chr2	65229968	65237636	K27ac_merged_peak_17234	1.15486	0.00134745
chr2	65245644	65268779	K27ac_merged_peak_17235	0.555159	0.0487268
chr2	68408028	68482290	K27ac_merged_peak_17266	0.32972	0.0447628
chr2	71670615	71696527	K27ac_merged_peak_17325	-0.537091	0.0394721
chr2	72977534	72986781	K27ac_merged_peak_17340	-1.46821	0.000609014
chr2	74647524	74694829	K27ac_merged_peak_17381	-0.425106	0.0163785
chr2	85177498	85252904	K27ac_merged_peak_17432	0.457341	0.00056742
chr2	85639810	85667980	K27ac_merged_peak_17445	-0.562391	0.0012251
chr2	85668800	85676529	K27ac_merged_peak_17446	-0.932976	0.0167397
chr2	85959778	86044123	K27ac_merged_peak_17455	-0.341156	0.0111981
chr2	88420343	88447593	K27ac_merged_peak_17488	-0.580753	0.00780069
chr2	88890277	88930943	K27ac_merged_peak_17493	0.624314	4.54498e-05
chr2	92296242	92298214	K27ac_merged_peak_17514	-0.704383	0.0306741
chr2	92315198	92321768	K27ac_merged_peak_17517	-0.527557	0.0234868
chr2	96998027	97013047	K27ac_merged_peak_17539	0.723087	0.0102845
chr2	101634053	101771667	K27ac_merged_peak_17620	0.305439	0.00330999
chr2	102377802	102493542	K27ac_merged_peak_17646	0.34964	0.00131803
chr2	106103343	106111790	K27ac_merged_peak_17683	0.916724	0.0300053
chr2	110904362	110910915	K27ac_merged_peak_17740	1.11259	0.0369482
chr2	112403922	112429687	K27ac_merged_peak_17756	0.918151	2.71359e-07
chr2	112650305	112710294	K27ac_merged_peak_17761	0.368469	0.0182427
chr2	112710935	112748332	K27ac_merged_peak_17762	0.597915	0.0145655
chr2	113066742	113090950	K27ac_merged_peak_17771	0.516305	0.0198701
chr2	113746925	113757911	K27ac_merged_peak_17790	1.63858	2.48927e-08
chr2	113829422	113848673	K27ac_merged_peak_17793	0.522885	0.0301333
chr2	113871716	113900171	K27ac_merged_peak_17794	0.571071	0.00120116
chr2	114777404	114784392	K27ac_merged_peak_17808	1.01457	0.00605992
chr2	117200902	117215935	K27ac_merged_peak_17813	0.548749	0.04302
chr2	120230927	120256494	K27ac_merged_peak_17846	-0.381203	0.0360394
chr2	122112079	122132173	K27ac_merged_peak_17876	0.602227	0.0288563
chr2	123384544	123432939	K27ac_merged_peak_17892	0.706967	1.17339e-07
chr2	123444633	123473676	K27ac_merged_peak_17894	0.713783	3.48132e-07
chr2	131856513	131871548	K27ac_merged_peak_17946	0.523927	0.0414668
chr2	134940840	134952860	K27ac_merged_peak_17986	1.6387	1.11334e-07
chr2	136700360	136714447	K27ac_merged_peak_18004	0.643836	0.00466443
chr2	146506854	146523146	K27ac_merged_peak_18044	0.962108	4.85195e-06
chr2	146555467	146563846	K27ac_merged_peak_18045	0.906833	0.0226514
chr2	151381163	151388410	K27ac_merged_peak_18093	0.900003	0.0452163
chr2	151464402	151492894	K27ac_merged_peak_18096	0.497666	0.0424406
chr2	153256071	153293457	K27ac_merged_peak_18113	0.405738	0.0335886
chr2	153299242	153306546	K27ac_merged_peak_18114	1.10101	0.00576585
chr2	160359876	160376393	K27ac_merged_peak_18181	0.931328	2.94618e-05
chr2	161120472	161133080	K27ac_merged_peak_18191	-0.598386	0.0316809
chr2	163454086	163470686	K27ac_merged_peak_18218	1.15496	0.0401769
chr2	165542447	165708999	K27ac_merged_peak_18240	0.28482	0.00381114
chr2	169063063	169073907	K27ac_merged_peak_18265	0.76646	0.0336596
chr2	169918713	169933068	K27ac_merged_peak_18280	0.81289	0.000215891
chr2	170362858	170371449	K27ac_merged_peak_18283	0.939786	0.0165251
chr2	173806128	173871457	K27ac_merged_peak_18348	0.522993	1.56654e-05
chr2	173884425	173926813	K27ac_merged_peak_18349	0.390289	0.00364724
chr2	173927671	173973787	K27ac_merged_peak_18350	0.56907	2.59696e-06
chr2	174842517	174872213	K27ac_merged_peak_18360	-0.445251	0.0266887
chr2	174982078	174987567	K27ac_merged_peak_18362	0.91813	0.0296052
chr2	178255754	178274832	K27ac_merged_peak_18403	0.595666	0.000110591
chr2	180086885	180144775	K27ac_merged_peak_18441	0.405898	0.00585538
chr2	180316116	180328060	K27ac_merged_peak_18444	0.927313	0.0153012
chr2	181374860	181391631	K27ac_merged_peak_18457	0.470766	0.040901
chr2	182833752	182845224	K27ac_merged_peak_18473	0.851465	0.0389279
chr2	188384833	188420552	K27ac_merged_peak_18505	0.279768	0.0486511
chr2	191117714	191151634	K27ac_merged_peak_18530	0.774504	2.42726e-06
chr2	192498915	192508777	K27ac_merged_peak_18554	0.857725	0.00205198
chr2	192540376	192559111	K27ac_merged_peak_18557	0.53306	0.00711974
chr2	196923974	196947303	K27ac_merged_peak_18578	0.675995	0.00474797
chr2	201074715	201097072	K27ac_merged_peak_18630	-0.649532	0.00359851
chr2	203127760	203154191	K27ac_merged_peak_18678	0.941017	3.39388e-07
chr2	204507653	204522606	K27ac_merged_peak_18696	-0.654207	0.0177798
chr2	205269221	205274538	K27ac_merged_peak_18704	1.30352	0.0143228
chr2	206853070	206857395	K27ac_merged_peak_18721	1.17045	0.0291098
chr2	207908217	207914405	K27ac_merged_peak_18732	1.15833	0.04482
chr2	209175743	209180709	K27ac_merged_peak_18754	1.5598	9.8383e-05
chr2	209208108	209240746	K27ac_merged_peak_18756	0.745137	8.09603e-08
chr2	210223981	210236926	K27ac_merged_peak_18758	0.955039	0.00563262
chr2	210252828	210261107	K27ac_merged_peak_18760	0.923319	0.0264215
chr2	217381200	217463518	K27ac_merged_peak_18819	0.688488	2.19369e-10
chr2	219257468	219272819	K27ac_merged_peak_18845	-0.658692	0.00437225
chr2	226752177	226764400	K27ac_merged_peak_18929	0.606248	0.0146957
chr2	226855522	226863821	K27ac_merged_peak_18930	0.88785	0.0302067
chr2	226978003	226990353	K27ac_merged_peak_18932	0.663195	0.00090415
chr2	227336081	227349478	K27ac_merged_peak_18938	0.59291	0.0441449
chr2	227372686	227412373	K27ac_merged_peak_18940	0.58102	3.16052e-06
chr2	227579862	227670455	K27ac_merged_peak_18947	0.457274	4.0293e-07
chr2	231355912	231390805	K27ac_merged_peak_18993	0.406271	0.0383727
chr2	233092180	233111003	K27ac_merged_peak_19022	0.908524	0.006868
chr2	234280570	234299056	K27ac_merged_peak_19047	-0.750197	0.0422141
chr2	236282172	236306967	K27ac_merged_peak_19078	0.510588	0.0426713
chr2	236348788	236359763	K27ac_merged_peak_19080	1.59747	2.75837e-05
chr2	236375717	236381509	K27ac_merged_peak_19081	1.10756	0.0216166
chr2	239550561	239557605	K27ac_merged_peak_19135	1.58385	0.000272486
chr2	241788819	241839073	K27ac_merged_peak_19159	-0.40639	0.0362726
chr20	1911749	1933729	K27ac_merged_peak_19224	-0.545815	0.0233032
chr20	2240371	2245916	K27ac_merged_peak_19232	-0.979825	0.0302067
chr20	3045958	3055371	K27ac_merged_peak_19252	0.928509	0.00153548
chr20	4089000	4095172	K27ac_merged_peak_19282	-1.17777	0.0149033
chr20	4166967	4176152	K27ac_merged_peak_19287	1.1066	0.00458192
chr20	4841865	4854844	K27ac_merged_peak_19294	0.853609	0.00325234
chr20	10294264	10312581	K27ac_merged_peak_19365	-0.681217	0.0313797
chr20	10345136	10363347	K27ac_merged_peak_19367	-0.628242	0.00482437
chr20	13208780	13261378	K27ac_merged_peak_19387	-0.46894	0.006868
chr20	14309328	14327462	K27ac_merged_peak_19401	0.453899	0.0479472
chr20	14376750	14410965	K27ac_merged_peak_19403	0.662526	7.02824e-06
chr20	14424611	14432666	K27ac_merged_peak_19404	1.0308	0.0128676
chr20	14553995	14559221	K27ac_merged_peak_19407	1.26247	0.00871695
chr20	21539888	21555634	K27ac_merged_peak_19492	-0.683352	0.0337696
chr20	32099153	32112580	K27ac_merged_peak_19587	-0.882283	0.00783596
chr20	32361973	32369229	K27ac_merged_peak_19596	1.14965	0.00500589
chr20	36648315	36729159	K27ac_merged_peak_19687	0.380813	0.00260597
chr20	42171919	42200931	K27ac_merged_peak_19740	-0.490028	0.0462076
chr20	48423573	48499781	K27ac_merged_peak_19858	0.327946	0.0407603
chr20	48581273	48590647	K27ac_merged_peak_19863	0.866144	0.0469291
chr20	49990886	50087990	K27ac_merged_peak_19894	0.569056	5.21049e-08
chr20	50340694	50387059	K27ac_merged_peak_19903	0.475937	0.000214445
chr20	51551798	51640851	K27ac_merged_peak_19923	0.345463	0.00640883
chr20	52232205	52244595	K27ac_merged_peak_19930	0.600857	0.00554832
chr20	52251973	52279349	K27ac_merged_peak_19931	0.522787	0.0259209
chr20	52375032	52407934	K27ac_merged_peak_19937	0.438754	0.0218856
chr20	52415335	52428193	K27ac_merged_peak_19938	0.896094	0.0492169
chr20	52439555	52450984	K27ac_merged_peak_19939	0.642125	0.0329177
chr20	52538920	52547917	K27ac_merged_peak_19944	1.21094	0.00136876
chr20	56529282	56538804	K27ac_merged_peak_19978	1.00163	0.0152001
chr20	60744179	60771151	K27ac_merged_peak_19999	-0.501993	0.0268073
chr21	16229522	16263488	K27ac_merged_peak_20073	0.717772	2.468e-07
chr21	16311512	16440619	K27ac_merged_peak_20076	0.428035	0.000308817
chr21	17029671	17043763	K27ac_merged_peak_20093	0.698184	0.0425815
chr21	18807927	18937130	K27ac_merged_peak_20114	0.427839	1.05666e-05
chr21	26822082	26835680	K27ac_merged_peak_20127	0.79456	0.00332504
chr21	27475582	27546002	K27ac_merged_peak_20142	0.328629	0.0335886
chr21	30535076	30582823	K27ac_merged_peak_20168	0.270365	0.0459899
chr21	34374765	34386608	K27ac_merged_peak_20200	0.863118	0.00471081
chr21	34743664	34770377	K27ac_merged_peak_20208	0.471202	0.0363465
chr21	36626538	36631755	K27ac_merged_peak_20251	1.0213	0.0314648
chr21	39657417	39678036	K27ac_merged_peak_20302	0.621011	0.027558
chr21	40100980	40200260	K27ac_merged_peak_20306	0.528961	7.90897e-10
chr21	40202624	40302372	K27ac_merged_peak_20307	0.501076	1.17339e-07
chr21	42847682	42892399	K27ac_merged_peak_20325	0.493108	0.00333183
chr21	45652808	45683791	K27ac_merged_peak_20398	0.539589	0.00215837
chr21	46872576	46922832	K27ac_merged_peak_20428	-0.449551	0.0118918
chr22	17838857	17923509	K27ac_merged_peak_20464	0.355148	0.0149033
chr22	18503310	18534299	K27ac_merged_peak_20480	0.480656	0.006229
chr22	18536662	18580772	K27ac_merged_peak_20481	0.291927	0.0268576
chr22	24034796	24046023	K27ac_merged_peak_20594	1.28178	0.000118041
chr22	25431362	25460615	K27ac_merged_peak_20628	0.535484	0.0452522
chr22	27286647	27294818	K27ac_merged_peak_20644	0.794025	0.0413889
chr22	30278394	30338007	K27ac_merged_peak_20692	0.432487	0.00586917
chr22	30385600	30453431	K27ac_merged_peak_20695	0.446482	0.0019223
chr22	30781791	30832615	K27ac_merged_peak_20703	-0.45911	0.00118294
chr22	32009251	32063731	K27ac_merged_peak_20734	0.485198	0.000364529
chr22	32220000	32245609	K27ac_merged_peak_20740	0.578833	0.0114293
chr22	34197035	34215916	K27ac_merged_peak_20783	0.910653	0.00162843
chr22	37405744	37442997	K27ac_merged_peak_20825	-0.620327	8.61713e-05
chr22	37887012	37919896	K27ac_merged_peak_20834	-0.573717	0.00689899
chr22	38547950	38592952	K27ac_merged_peak_20855	0.3814	0.00658511
chr22	38594424	38620860	K27ac_merged_peak_20856	0.491968	0.0110187
chr22	39565383	39577067	K27ac_merged_peak_20887	-0.635853	0.0452163
chr22	43256290	43376274	K27ac_merged_peak_20992	0.488057	1.81762e-08
chr22	46163834	46203778	K27ac_merged_peak_21051	0.458693	0.00735537
chr22	46417158	46515754	K27ac_merged_peak_21057	-0.287537	0.0288544
chr22	50320653	50364949	K27ac_merged_peak_21093	0.34244	0.0350386
chr3	948341	958358	K27ac_merged_peak_21123	1.15327	0.0118736
chr3	2879864	2922832	K27ac_merged_peak_21125	0.773229	8.75234e-12
chr3	4741685	4807342	K27ac_merged_peak_21143	0.325517	0.0139167
chr3	16089207	16121288	K27ac_merged_peak_21309	0.509415	0.000629774
chr3	16138621	16147824	K27ac_merged_peak_21310	0.982175	0.00295289
chr3	16407221	16580555	K27ac_merged_peak_21314	0.286395	0.0160247
chr3	17515702	17526483	K27ac_merged_peak_21332	1.39552	6.14803e-09
chr3	20075458	20129682	K27ac_merged_peak_21345	0.307243	0.048618
chr3	23210419	23215096	K27ac_merged_peak_21363	1.17062	0.0366843
chr3	23952128	23974711	K27ac_merged_peak_21376	0.479966	0.0385649
chr3	24166460	24229618	K27ac_merged_peak_21383	0.377547	0.0362908
chr3	24258800	24321727	K27ac_merged_peak_21384	0.823087	7.06331e-16
chr3	24327665	24439480	K27ac_merged_peak_21385	0.532593	2.23339e-08
chr3	24440799	24547419	K27ac_merged_peak_21386	0.284608	0.0169784
chr3	24629707	24652693	K27ac_merged_peak_21389	0.677849	0.00189243
chr3	27315937	27325788	K27ac_merged_peak_21410	0.827432	0.0424665
chr3	30271258	30277477	K27ac_merged_peak_21439	-0.891263	0.0452163
chr3	32527295	32548930	K27ac_merged_peak_21475	0.517995	0.0335632
chr3	36939131	36988714	K27ac_merged_peak_21511	0.350636	0.0486511
chr3	36992495	37002426	K27ac_merged_peak_21512	0.61305	0.017774
chr3	37112548	37227040	K27ac_merged_peak_21517	0.415731	0.00071949
chr3	39935647	39955593	K27ac_merged_peak_21565	0.661455	0.00755043
chr3	40139277	40149359	K27ac_merged_peak_21568	1.22549	0.00254582
chr3	41717297	41738852	K27ac_merged_peak_21591	0.762208	0.000267194
chr3	42052539	42134120	K27ac_merged_peak_21595	0.424495	4.95003e-05
chr3	46960377	47004822	K27ac_merged_peak_21704	-0.386918	0.028106
chr3	49165868	49174479	K27ac_merged_peak_21755	-1.00008	0.0288413
chr3	57955225	57973690	K27ac_merged_peak_21882	-0.745238	0.000610082
chr3	58371217	58378000	K27ac_merged_peak_21891	1.03364	0.0171623
chr3	58980047	58990620	K27ac_merged_peak_21903	1.00641	0.00410862
chr3	61163007	61172876	K27ac_merged_peak_21920	0.767309	0.0124839
chr3	61856393	61961259	K27ac_merged_peak_21939	0.496683	0.000620413
chr3	67617714	67711956	K27ac_merged_peak_21988	0.423538	7.68331e-05
chr3	69219938	69273985	K27ac_merged_peak_22000	0.370949	0.00586917
chr3	72095123	72111337	K27ac_merged_peak_22031	0.72943	0.0351572
chr3	72164464	72189880	K27ac_merged_peak_22033	1.00031	1.17339e-07
chr3	72385844	72392049	K27ac_merged_peak_22042	1.40926	0.00617497
chr3	72860920	72878682	K27ac_merged_peak_22054	0.820071	0.000214337
chr3	74313902	74325561	K27ac_merged_peak_22070	0.575354	0.0166509
chr3	74446997	74467404	K27ac_merged_peak_22075	0.882415	1.24464e-10
chr3	74540852	74548648	K27ac_merged_peak_22077	1.37166	0.000658002
chr3	95978737	95990887	K27ac_merged_peak_22166	0.72527	0.0327419
chr3	97696498	97704475	K27ac_merged_peak_22176	1.04549	0.0104328
chr3	99583213	99604278	K27ac_merged_peak_22191	0.866404	0.000125065
chr3	99606499	99652166	K27ac_merged_peak_22192	0.426414	0.00689899
chr3	99781527	99809983	K27ac_merged_peak_22197	0.68951	0.00113987
chr3	101541831	101591009	K27ac_merged_peak_22228	0.539133	2.01356e-05
chr3	101605371	101615127	K27ac_merged_peak_22230	0.638058	0.0226218
chr3	101651668	101662102	K27ac_merged_peak_22233	0.996774	0.00871157
chr3	101873394	101889157	K27ac_merged_peak_22238	0.850345	0.00355601
chr3	109354701	109366267	K27ac_merged_peak_22295	0.871959	0.00454568
chr3	111613647	111692378	K27ac_merged_peak_22318	0.342301	0.0124402
chr3	111801558	111825428	K27ac_merged_peak_22323	0.573	0.0250476
chr3	113217561	113228980	K27ac_merged_peak_22333	1.25345	0.000101165
chr3	114252926	114295102	K27ac_merged_peak_22352	0.535473	0.00709441
chr3	114296246	114380676	K27ac_merged_peak_22353	0.355377	0.00895076
chr3	114383159	114488300	K27ac_merged_peak_22354	0.608807	5.55308e-10
chr3	114855874	114869903	K27ac_merged_peak_22364	0.747046	0.00368581
chr3	119706489	119718985	K27ac_merged_peak_22395	1.31371	0.000454939
chr3	120350930	120417204	K27ac_merged_peak_22410	-0.370319	0.0204997
chr3	122167780	122239270	K27ac_merged_peak_22427	0.560389	1.49441e-05
chr3	122322723	122333440	K27ac_merged_peak_22430	0.845106	0.0112168
chr3	124246593	124253161	K27ac_merged_peak_22464	1.09583	0.0288413
chr3	124301244	124360097	K27ac_merged_peak_22467	0.376617	0.0118736
chr3	124477181	124508123	K27ac_merged_peak_22471	-0.602574	0.00726476
chr3	124509308	124591903	K27ac_merged_peak_22472	0.380549	0.000404133
chr3	126157330	126267218	K27ac_merged_peak_22504	-0.323713	0.00909735
chr3	126856084	126863352	K27ac_merged_peak_22509	1.3362	0.00825225
chr3	132344896	132351277	K27ac_merged_peak_22608	0.965424	0.0309837
chr3	133927461	133972546	K27ac_merged_peak_22625	0.528657	0.00490828
chr3	134026953	134061362	K27ac_merged_peak_22626	-0.385896	0.0280465
chr3	135699052	135716969	K27ac_merged_peak_22637	1.00699	5.19039e-05
chr3	136599549	136682443	K27ac_merged_peak_22656	0.427818	0.0024096
chr3	141113402	141137314	K27ac_merged_peak_22705	0.564583	0.000152651
chr3	143021452	143036099	K27ac_merged_peak_22747	0.850475	0.00542676
chr3	143819611	143832267	K27ac_merged_peak_22757	0.814896	0.0298728
chr3	143874803	143889032	K27ac_merged_peak_22758	0.747705	0.00325234
chr3	146023717	146035618	K27ac_merged_peak_22773	-0.85248	0.00837417
chr3	146218673	146269144	K27ac_merged_peak_22776	0.459713	0.00144102
chr3	148881190	148974822	K27ac_merged_peak_22792	0.331299	0.00134745
chr3	149607658	149615541	K27ac_merged_peak_22803	1.27951	0.00250295
chr3	149980898	149998948	K27ac_merged_peak_22812	0.853805	4.60573e-06
chr3	150023657	150044469	K27ac_merged_peak_22814	0.490152	0.0452163
chr3	150211697	150219181	K27ac_merged_peak_22820	1.19261	0.00273497
chr3	151572269	151584958	K27ac_merged_peak_22841	-0.719433	0.0296052
chr3	152851707	152867419	K27ac_merged_peak_22859	0.599008	0.0104796
chr3	154846199	154853155	K27ac_merged_peak_22871	1.17333	0.00956877
chr3	160380786	160403198	K27ac_merged_peak_22948	0.362937	0.0275357
chr3	168231779	168241110	K27ac_merged_peak_23002	1.15884	0.0057151
chr3	169681258	169718266	K27ac_merged_peak_23012	0.46421	0.0231931
chr3	170454983	170474430	K27ac_merged_peak_23028	0.434451	0.0342114
chr3	170474962	170491832	K27ac_merged_peak_23029	0.841763	1.20704e-05
chr3	170493972	170506579	K27ac_merged_peak_23030	0.916143	0.00130927
chr3	170524502	170535544	K27ac_merged_peak_23031	0.668281	0.048934
chr3	170998910	171005363	K27ac_merged_peak_23041	0.945358	0.0316809
chr3	171494452	171533926	K27ac_merged_peak_23054	0.410478	0.0328978
chr3	171745276	171947756	K27ac_merged_peak_23061	0.24918	0.00577141
chr3	171948825	172098570	K27ac_merged_peak_23062	0.378243	0.000393433
chr3	174892041	174921196	K27ac_merged_peak_23084	1.33936	1.96374e-13
chr3	174969816	174981005	K27ac_merged_peak_23087	1.25417	0.000871912
chr3	175051219	175078361	K27ac_merged_peak_23089	0.816082	0.000201229
chr3	175627559	175638185	K27ac_merged_peak_23097	0.947002	0.0163564
chr3	177517461	177574835	K27ac_merged_peak_23125	0.311122	0.0172201
chr3	185510792	185517156	K27ac_merged_peak_23233	1.46087	0.000215891
chr3	186276615	186346356	K27ac_merged_peak_23244	0.294869	0.00715812
chr3	187863671	188030216	K27ac_merged_peak_23283	0.255987	0.00506948
chr3	189342224	189353840	K27ac_merged_peak_23315	0.742075	0.0285731
chr3	193547368	193555962	K27ac_merged_peak_23366	0.814638	0.0492169
chr3	193587459	193598472	K27ac_merged_peak_23368	1.20706	0.000654864
chr3	194284999	194317914	K27ac_merged_peak_23387	0.411541	0.0311129
chr3	195434929	195449947	K27ac_merged_peak_23406	0.865829	4.66174e-07
chr3	196479538	196487485	K27ac_merged_peak_23434	1.3053	0.00131803
chr4	1790907	1819837	K27ac_merged_peak_23497	-0.620529	0.0270819
chr4	6880281	6897208	K27ac_merged_peak_23570	-0.542483	0.0430461
chr4	7193195	7231301	K27ac_merged_peak_23578	-0.604652	0.000770359
chr4	7556218	7570866	K27ac_merged_peak_23582	0.885555	0.000119209
chr4	8534350	8544640	K27ac_merged_peak_23596	0.705039	0.0113523
chr4	13903485	13926590	K27ac_merged_peak_23627	0.501939	0.0106785
chr4	14907200	14923012	K27ac_merged_peak_23637	0.453439	0.0328505
chr4	15025691	15047983	K27ac_merged_peak_23643	0.632994	0.00576585
chr4	16245255	16268280	K27ac_merged_peak_23664	-0.632999	0.000649938
chr4	16745708	16750550	K27ac_merged_peak_23667	1.2427	0.0149789
chr4	20586791	20595768	K27ac_merged_peak_23687	1.26415	0.00461224
chr4	22453361	22519999	K27ac_merged_peak_23694	0.372376	0.0190412
chr4	23236387	23242610	K27ac_merged_peak_23701	1.88956	0.000331362
chr4	23787105	23792613	K27ac_merged_peak_23705	1.00546	0.0296052
chr4	23919672	23940479	K27ac_merged_peak_23708	0.871715	5.65202e-06
chr4	24196748	24246056	K27ac_merged_peak_23719	0.364926	0.0167226
chr4	24277263	24286984	K27ac_merged_peak_23720	0.764883	0.0425364
chr4	28312039	28319758	K27ac_merged_peak_23766	-0.941708	0.0189877
chr4	32859906	32868894	K27ac_merged_peak_23776	1.04252	0.0244715
chr4	38056665	38091694	K27ac_merged_peak_23807	0.600554	0.00981906
chr4	38109713	38199394	K27ac_merged_peak_23808	0.769647	3.62002e-15
chr4	48029753	48053459	K27ac_merged_peak_23905	0.511604	0.0152507
chr4	48087208	48099546	K27ac_merged_peak_23907	0.694031	0.0319343
chr4	54914670	54960784	K27ac_merged_peak_23989	0.343529	0.0067687
chr4	68264450	68266119	K27ac_merged_peak_24023	-0.568307	0.0440889
chr4	69576967	69587127	K27ac_merged_peak_24039	-0.696916	0.0219765
chr4	70409849	70421587	K27ac_merged_peak_24060	-0.855438	0.0362726
chr4	70430487	70450203	K27ac_merged_peak_24061	-1.24825	6.06097e-06
chr4	71698333	71711326	K27ac_merged_peak_24081	0.805084	0.0119581
chr4	72971203	72985162	K27ac_merged_peak_24104	1.0647	8.35924e-05
chr4	82410286	82422649	K27ac_merged_peak_24218	1.00982	0.00461224
chr4	82532797	82558219	K27ac_merged_peak_24223	0.441014	0.00253305
chr4	82642918	82649986	K27ac_merged_peak_24226	0.699814	0.036107
chr4	85722989	85740767	K27ac_merged_peak_24255	1.30656	1.51246e-07
chr4	87837033	87910480	K27ac_merged_peak_24267	0.324867	0.00770061
chr4	88783620	88794856	K27ac_merged_peak_24283	-0.878959	0.00472455
chr4	90121926	90128582	K27ac_merged_peak_24318	1.14394	0.00317481
chr4	90191384	90207212	K27ac_merged_peak_24321	0.540658	0.0444651
chr4	90208725	90230208	K27ac_merged_peak_24322	0.564729	0.0281637
chr4	99695051	99703979	K27ac_merged_peak_24355	1.26461	0.000426213
chr4	100361693	100369755	K27ac_merged_peak_24370	-0.856147	0.0440889
chr4	103603473	103611386	K27ac_merged_peak_24405	0.869902	0.0172081
chr4	105811255	105824522	K27ac_merged_peak_24427	1.08195	0.00145365
chr4	105858411	105868736	K27ac_merged_peak_24430	1.43396	6.96012e-05
chr4	106502775	106529983	K27ac_merged_peak_24435	0.520335	0.00542219
chr4	110642601	110660968	K27ac_merged_peak_24470	-0.624422	0.0479762
chr4	111195758	111200895	K27ac_merged_peak_24477	1.69697	0.00048414
chr4	111205721	111218934	K27ac_merged_peak_24478	1.67436	2.48927e-08
chr4	111225156	111234044	K27ac_merged_peak_24479	1.46513	4.60573e-06
chr4	114311106	114320785	K27ac_merged_peak_24505	0.943437	0.0110501
chr4	114323003	114336494	K27ac_merged_peak_24506	0.771752	0.000339244
chr4	114360505	114381373	K27ac_merged_peak_24509	0.996535	1.11765e-07
chr4	114871193	114904740	K27ac_merged_peak_24524	0.444193	0.0145116
chr4	118336736	118342644	K27ac_merged_peak_24531	1.0896	0.0413718
chr4	123674721	123722894	K27ac_merged_peak_24575	0.326904	0.012298
chr4	128878580	128900344	K27ac_merged_peak_24602	0.744419	0.000707239
chr4	129065186	129117758	K27ac_merged_peak_24606	0.45593	0.00936406
chr4	139855503	139912485	K27ac_merged_peak_24650	0.715729	3.36621e-06
chr4	139925432	139979382	K27ac_merged_peak_24651	0.377787	0.0381976
chr4	140160297	140171459	K27ac_merged_peak_24655	1.27181	2.38085e-06
chr4	140919424	140952211	K27ac_merged_peak_24681	-0.679352	0.000432738
chr4	140963154	140984688	K27ac_merged_peak_24682	-0.63175	0.0431282
chr4	143182013	143197799	K27ac_merged_peak_24711	0.976519	0.00056742
chr4	150320251	150333391	K27ac_merged_peak_24765	-0.902456	0.018076
chr4	151218329	151234807	K27ac_merged_peak_24773	0.678281	0.00980075
chr4	151419737	151423932	K27ac_merged_peak_24778	1.48442	0.00508911
chr4	151429781	151449133	K27ac_merged_peak_24779	1.14898	1.49054e-07
chr4	152191088	152259412	K27ac_merged_peak_24795	0.453367	9.27637e-05
chr4	152335550	152345690	K27ac_merged_peak_24799	1.13955	0.00135034
chr4	154383332	154523129	K27ac_merged_peak_24825	0.364473	0.00029011
chr4	156622314	156628963	K27ac_merged_peak_24844	1.14156	0.0331038
chr4	156853950	156884155	K27ac_merged_peak_24853	0.436344	0.0475214
chr4	157098824	157122935	K27ac_merged_peak_24854	0.834862	9.74263e-06
chr4	159686282	159800603	K27ac_merged_peak_24868	0.478954	1.87238e-07
chr4	159863790	159872499	K27ac_merged_peak_24873	0.83943	0.0368544
chr4	159912095	159941846	K27ac_merged_peak_24875	0.484102	0.00330999
chr4	160034315	160090002	K27ac_merged_peak_24879	0.45736	0.0117943
chr4	163591465	163611114	K27ac_merged_peak_24896	0.672624	0.00195657
chr4	167941524	167973731	K27ac_merged_peak_24920	0.648721	3.10193e-06
chr4	168015134	168028484	K27ac_merged_peak_24921	1.15673	0.000541456
chr4	170114274	170131841	K27ac_merged_peak_24949	0.672623	0.00570672
chr4	170136547	170194744	K27ac_merged_peak_24950	0.306343	0.0166664
chr4	173896089	173907274	K27ac_merged_peak_24973	1.15624	0.00277179
chr4	185150718	185160691	K27ac_merged_peak_25036	0.878135	0.0260296
chr4	187640695	187661131	K27ac_merged_peak_25094	0.39074	0.0343606
chr4	187749226	187758117	K27ac_merged_peak_25099	1.07262	0.0136615
chr4	187812833	187843568	K27ac_merged_peak_25100	0.689575	7.36343e-05
chr5	1314645	1349602	K27ac_merged_peak_25142	-0.561232	0.00690913
chr5	1509879	1526651	K27ac_merged_peak_25146	0.967108	8.22774e-07
chr5	1531121	1541466	K27ac_merged_peak_25147	0.946795	0.00831779
chr5	6818495	6830420	K27ac_merged_peak_25181	1.18792	0.00164578
chr5	6870511	6876128	K27ac_merged_peak_25182	0.941003	0.0302067
chr5	10589255	10616196	K27ac_merged_peak_25213	0.772705	8.2704e-05
chr5	14653713	14737988	K27ac_merged_peak_25231	0.303953	0.0175169
chr5	14739064	14835996	K27ac_merged_peak_25232	0.346441	0.00933809
chr5	14838564	14878492	K27ac_merged_peak_25233	0.437016	0.0422873
chr5	16448450	16514858	K27ac_merged_peak_25241	0.381019	0.00473885
chr5	16528644	16555437	K27ac_merged_peak_25243	0.471909	0.00446374
chr5	31012932	31038589	K27ac_merged_peak_25284	0.694978	0.000131599
chr5	32625456	32637633	K27ac_merged_peak_25304	-0.788682	0.0380654
chr5	36868484	36917169	K27ac_merged_peak_25369	0.750025	3.80458e-06
chr5	36924322	36955645	K27ac_merged_peak_25370	0.792014	0.000863041
chr5	37713217	37727936	K27ac_merged_peak_25379	0.845475	0.00471081
chr5	37728690	37743743	K27ac_merged_peak_25380	1.04822	8.98962e-07
chr5	38991710	39034437	K27ac_merged_peak_25393	0.641752	5.90086e-05
chr5	39048321	39084668	K27ac_merged_peak_25394	0.612057	7.85772e-05
chr5	40685782	40696628	K27ac_merged_peak_25421	0.70915	0.0246166
chr5	43416866	43438830	K27ac_merged_peak_25462	0.477611	0.00332969
chr5	44872589	44882978	K27ac_merged_peak_25476	1.02626	0.0095616
chr5	49993279	49997303	K27ac_merged_peak_25483	1.1952	0.0252567
chr5	54886279	54909624	K27ac_merged_peak_25539	0.476899	0.0228487
chr5	54910946	54947414	K27ac_merged_peak_25540	0.672489	1.8445e-07
chr5	55221871	55302993	K27ac_merged_peak_25547	0.315148	0.0254388
chr5	56940865	57051517	K27ac_merged_peak_25581	0.363999	9.89774e-05
chr5	60344200	60352922	K27ac_merged_peak_25617	1.03302	0.00877175
chr5	67064211	67070913	K27ac_merged_peak_25690	-0.929425	0.012298
chr5	68497061	68540276	K27ac_merged_peak_25732	0.5749	0.000308817
chr5	68718720	68755662	K27ac_merged_peak_25736	0.79003	8.55035e-09
chr5	68776681	68810436	K27ac_merged_peak_25738	0.561575	1.0485e-05
chr5	68811725	68829605	K27ac_merged_peak_25739	0.469509	0.0330012
chr5	76076363	76091218	K27ac_merged_peak_25822	0.544111	0.0347277
chr5	80559285	80568889	K27ac_merged_peak_25894	0.832602	0.00624709
chr5	80712310	80727514	K27ac_merged_peak_25899	0.719766	0.0147211
chr5	82176412	82188336	K27ac_merged_peak_25920	0.812422	0.0440889
chr5	90153962	90218973	K27ac_merged_peak_25960	0.488108	1.1388e-06
chr5	90225330	90241699	K27ac_merged_peak_25961	0.690688	0.000392408
chr5	90297312	90336351	K27ac_merged_peak_25964	0.399916	0.0102735
chr5	90339067	90376795	K27ac_merged_peak_25965	0.450816	0.00930308
chr5	90656592	90684208	K27ac_merged_peak_25974	0.418274	0.0257943
chr5	93563323	93587461	K27ac_merged_peak_25993	-0.688167	0.00192986
chr5	95396832	95438706	K27ac_merged_peak_26014	0.478464	0.000437395
chr5	98236524	98246689	K27ac_merged_peak_26044	0.756807	0.043181
chr5	102951033	102963111	K27ac_merged_peak_26069	1.01716	0.000505807
chr5	108690584	108733385	K27ac_merged_peak_26094	0.79288	0.000560892
chr5	108734395	108749955	K27ac_merged_peak_26095	0.594006	0.0149033
chr5	109071397	109126936	K27ac_merged_peak_26101	0.42424	0.00982977
chr5	109196809	109218050	K27ac_merged_peak_26105	0.78978	0.000945567
chr5	110185435	110190590	K27ac_merged_peak_26120	1.40856	0.00758598
chr5	110207761	110222420	K27ac_merged_peak_26121	0.802615	0.00715391
chr5	110290021	110312510	K27ac_merged_peak_26125	0.622376	0.000664412
chr5	112439623	112583805	K27ac_merged_peak_26147	0.252484	0.0302283
chr5	112646384	112669460	K27ac_merged_peak_26151	-0.477023	0.0437281
chr5	114884125	114903110	K27ac_merged_peak_26178	0.493135	0.0355724
chr5	115030655	115061138	K27ac_merged_peak_26185	0.62311	0.00722761
chr5	115066984	115114472	K27ac_merged_peak_26186	0.471731	0.00966594
chr5	119470759	119478922	K27ac_merged_peak_26232	0.920297	0.0207323
chr5	123962625	123980855	K27ac_merged_peak_26262	0.743485	0.00407408
chr5	125770512	125811215	K27ac_merged_peak_26288	0.425147	0.0414018
chr5	131012197	131027035	K27ac_merged_peak_26323	0.741425	0.0489953
chr5	133149435	133161124	K27ac_merged_peak_26361	0.69385	0.0162525
chr5	133458626	133492556	K27ac_merged_peak_26371	0.528494	0.0475776
chr5	133824545	133892847	K27ac_merged_peak_26381	-0.402584	0.00992347
chr5	135453074	135513338	K27ac_merged_peak_26404	0.456126	0.00267695
chr5	139594008	139608425	K27ac_merged_peak_26469	0.636345	0.0359355
chr5	139632029	139643119	K27ac_merged_peak_26470	0.893209	0.00557914
chr5	141369851	141405576	K27ac_merged_peak_26508	0.423985	0.0287388
chr5	142595423	142634268	K27ac_merged_peak_26542	0.42652	0.00162774
chr5	143826933	143836628	K27ac_merged_peak_26559	-0.836187	0.0361609
chr5	148450158	148455871	K27ac_merged_peak_26603	1.29336	0.0133379
chr5	148582620	148625632	K27ac_merged_peak_26605	-0.448786	0.0410437
chr5	149836858	149945192	K27ac_merged_peak_26630	-0.336568	0.00330999
chr5	157175080	157179537	K27ac_merged_peak_26702	1.14868	0.0390838
chr5	172189987	172240306	K27ac_merged_peak_26793	0.234659	0.0362726
chr5	173182731	173237864	K27ac_merged_peak_26812	0.295572	0.0426713
chr5	173303646	173402476	K27ac_merged_peak_26814	0.3798	0.000502141
chr5	176322546	176335323	K27ac_merged_peak_26834	0.695852	0.0407758
chr5	176511301	176528036	K27ac_merged_peak_26838	-0.662669	0.0419837
chr5	176715041	176812299	K27ac_merged_peak_26843	-0.375047	0.00273497
chr5	176950386	176983437	K27ac_merged_peak_26853	-0.479031	0.0306756
chr5	179428209	179463722	K27ac_merged_peak_26887	0.518624	0.0487268
chr6	417557	425765	K27ac_merged_peak_26913	0.752906	0.0199824
chr6	895654	906143	K27ac_merged_peak_26918	0.982068	0.0072725
chr6	1123527	1141929	K27ac_merged_peak_26921	1.16664	3.10193e-06
chr6	6914299	6935034	K27ac_merged_peak_27003	0.810934	0.00812847
chr6	7038924	7063437	K27ac_merged_peak_27007	-0.575615	0.0106058
chr6	8536501	8560130	K27ac_merged_peak_27025	0.651902	0.00139026
chr6	8667522	8685317	K27ac_merged_peak_27028	0.952428	4.91178e-05
chr6	11334782	11355253	K27ac_merged_peak_27066	0.432572	0.0189708
chr6	16652678	16701806	K27ac_merged_peak_27164	0.329882	0.0369482
chr6	18140246	18160871	K27ac_merged_peak_27203	0.549646	0.0057201
chr6	18583862	18603788	K27ac_merged_peak_27213	0.995583	5.55321e-05
chr6	18630784	18636688	K27ac_merged_peak_27214	1.44189	0.00260932
chr6	20850718	20885395	K27ac_merged_peak_27227	0.487559	0.00137211
chr6	21016842	21056796	K27ac_merged_peak_27233	0.649501	1.51186e-05
chr6	21553103	21562637	K27ac_merged_peak_27240	1.42253	0.000921729
chr6	23883091	23897806	K27ac_merged_peak_27260	1.15792	0.000115533
chr6	25872041	25892784	K27ac_merged_peak_27289	-0.503421	0.0302067
chr6	25894397	25947391	K27ac_merged_peak_27290	-0.489216	0.00250409
chr6	29809185	29819112	K27ac_merged_peak_27383	1.27862	0.000463651
chr6	30447485	30465955	K27ac_merged_peak_27404	0.77315	0.000945567
chr6	30475442	30489404	K27ac_merged_peak_27405	0.790885	0.0203835
chr6	30494039	30506379	K27ac_merged_peak_27406	0.599676	0.00968093
chr6	30629269	30757229	K27ac_merged_peak_27411	-0.315499	0.00170765
chr6	33552382	33561298	K27ac_merged_peak_27486	0.761157	0.00783596
chr6	34188741	34218927	K27ac_merged_peak_27502	0.596776	1.72458e-05
chr6	34770638	34794461	K27ac_merged_peak_27514	0.762685	0.000259373
chr6	35309073	35351034	K27ac_merged_peak_27535	0.480706	0.00071949
chr6	35353540	35398536	K27ac_merged_peak_27536	0.875832	1.74139e-12
chr6	36981564	37011937	K27ac_merged_peak_27576	0.827476	6.48983e-07
chr6	39672211	39681572	K27ac_merged_peak_27629	0.934628	0.00560065
chr6	41176677	41186029	K27ac_merged_peak_27642	1.58356	1.43415e-05
chr6	44885444	44897767	K27ac_merged_peak_27728	1.37374	1.8445e-07
chr6	44920891	44938832	K27ac_merged_peak_27731	1.31704	1.55335e-09
chr6	47706460	47712757	K27ac_merged_peak_27774	0.924117	0.0314766
chr6	49516471	49527963	K27ac_merged_peak_27783	0.715938	0.0107174
chr6	51537947	51551423	K27ac_merged_peak_27794	0.736854	0.0482615
chr6	51726531	51735635	K27ac_merged_peak_27800	1.11832	0.00300063
chr6	52580603	52620790	K27ac_merged_peak_27823	-0.415865	0.00709441
chr6	53109544	53151086	K27ac_merged_peak_27835	0.532722	0.0302067
chr6	53502664	53546224	K27ac_merged_peak_27850	0.366803	0.0144685
chr6	56361088	56427731	K27ac_merged_peak_27869	0.550602	6.57493e-05
chr6	56452981	56634701	K27ac_merged_peak_27871	0.338083	1.9891e-05
chr6	58776266	58779320	K27ac_merged_peak_27900	-0.449695	1.27014e-08
chr6	64149435	64261353	K27ac_merged_peak_27909	0.400168	5.14162e-06
chr6	64343016	64436632	K27ac_merged_peak_27912	0.353775	0.00505267
chr6	70465904	70508543	K27ac_merged_peak_27926	0.672727	9.27637e-05
chr6	72071226	72081636	K27ac_merged_peak_27949	0.811665	0.0480157
chr6	73122008	73127772	K27ac_merged_peak_27953	1.58464	0.000760728
chr6	76453426	76474303	K27ac_merged_peak_27987	0.585123	0.00939099
chr6	82158997	82167642	K27ac_merged_peak_28041	1.25971	5.08204e-05
chr6	82431195	82504300	K27ac_merged_peak_28046	0.393449	0.000989958
chr6	82521032	82548997	K27ac_merged_peak_28047	0.45675	0.0434909
chr6	82634703	82654582	K27ac_merged_peak_28054	0.739958	1.16534e-06
chr6	82685890	82698290	K27ac_merged_peak_28057	0.718894	0.043792
chr6	82852064	82858402	K27ac_merged_peak_28063	1.08336	0.017071
chr6	84900805	84907043	K27ac_merged_peak_28077	0.917468	0.0363662
chr6	87920786	87925677	K27ac_merged_peak_28111	1.18762	0.0375914
chr6	90876976	90917149	K27ac_merged_peak_28168	0.387964	0.0425815
chr6	90919011	90967404	K27ac_merged_peak_28169	0.745231	2.76666e-08
chr6	90983065	91009373	K27ac_merged_peak_28170	0.406854	0.0369482
chr6	91111302	91128252	K27ac_merged_peak_28173	0.894986	0.00190047
chr6	106868561	106875896	K27ac_merged_peak_28244	1.72833	0.000318167
chr6	106991317	107023518	K27ac_merged_peak_28247	0.519091	0.0189337
chr6	107156268	107253768	K27ac_merged_peak_28251	0.28291	0.0112326
chr6	107529870	107541988	K27ac_merged_peak_28257	0.878886	0.0278546
chr6	108446128	108457993	K27ac_merged_peak_28275	1.06692	0.000184804
chr6	111971024	112021017	K27ac_merged_peak_28354	0.518175	0.00063993
chr6	114004406	114027123	K27ac_merged_peak_28377	0.640303	0.00437225
chr6	119212446	119229950	K27ac_merged_peak_28435	-0.663524	0.0176951
chr6	125828321	125837654	K27ac_merged_peak_28488	0.819988	0.0174943
chr6	125901139	125911457	K27ac_merged_peak_28491	0.808377	0.0191464
chr6	126365965	126391099	K27ac_merged_peak_28498	0.55728	0.00481447
chr6	126849624	126869780	K27ac_merged_peak_28507	0.563294	0.00403404
chr6	127794856	127813167	K27ac_merged_peak_28518	0.501928	0.0282769
chr6	128621998	128845137	K27ac_merged_peak_28529	0.319052	0.0012251
chr6	129810438	129817185	K27ac_merged_peak_28533	1.22618	0.00537823
chr6	130349312	130359922	K27ac_merged_peak_28544	0.816187	0.0329188
chr6	130623328	130635831	K27ac_merged_peak_28547	0.736717	0.0381682
chr6	131144285	131188470	K27ac_merged_peak_28550	0.353745	0.0452431
chr6	136311593	136319061	K27ac_merged_peak_28660	1.35796	0.00368695
chr6	136804375	136876735	K27ac_merged_peak_28671	0.35198	0.00297083
chr6	138022547	138066979	K27ac_merged_peak_28691	1.09557	2.73271e-13
chr6	138113652	138135164	K27ac_merged_peak_28692	1.20046	2.30333e-09
chr6	138177710	138206775	K27ac_merged_peak_28694	0.529591	0.00281629
chr6	138402945	138415974	K27ac_merged_peak_28702	0.794107	9.51272e-05
chr6	138416986	138433482	K27ac_merged_peak_28703	0.556695	0.0288413
chr6	138949533	139018405	K27ac_merged_peak_28714	0.723434	2.02553e-08
chr6	140359954	140376083	K27ac_merged_peak_28742	0.809504	0.000206997
chr6	141638077	141660977	K27ac_merged_peak_28761	0.985781	4.74606e-06
chr6	141699539	141709766	K27ac_merged_peak_28762	0.773621	0.00789344
chr6	141866424	141887017	K27ac_merged_peak_28765	0.701988	0.000272486
chr6	142195654	142205629	K27ac_merged_peak_28767	1.02537	0.00255022
chr6	143134678	143180352	K27ac_merged_peak_28784	0.333182	0.0212682
chr6	143375077	143623227	K27ac_merged_peak_28789	0.225047	0.0492749
chr6	144711617	144719337	K27ac_merged_peak_28817	0.942656	0.0161215
chr6	151151809	151164658	K27ac_merged_peak_28926	1.51521	0.000123952
chr6	151333654	151396040	K27ac_merged_peak_28930	0.599155	1.12921e-08
chr6	152405613	152423725	K27ac_merged_peak_28958	0.711944	0.0137935
chr6	157500284	157512245	K27ac_merged_peak_29005	0.938987	0.006229
chr6	158231107	158238823	K27ac_merged_peak_29022	1.12079	0.0391792
chr6	159407220	159424921	K27ac_merged_peak_29051	0.548179	0.0274324
chr6	160098194	160125781	K27ac_merged_peak_29058	0.429436	0.00560065
chr6	161449064	161462817	K27ac_merged_peak_29087	0.732726	0.0440889
chr6	162338733	162373125	K27ac_merged_peak_29094	0.406048	0.0392496
chr6	162513505	162528165	K27ac_merged_peak_29097	0.755151	0.0355995
chr6	167087465	167093143	K27ac_merged_peak_29138	1.07957	0.041211
chr6	167710823	167728580	K27ac_merged_peak_29148	0.671171	0.00280871
chr6	167752886	167767856	K27ac_merged_peak_29151	0.668415	0.00101456
chr6	168216043	168270660	K27ac_merged_peak_29161	0.733632	1.82486e-10
chr6	168271686	168314371	K27ac_merged_peak_29162	0.662099	0.00139346
chr6	169923690	169935264	K27ac_merged_peak_29190	-1.05627	0.00316659
chr7	377242	385093	K27ac_merged_peak_29222	1.33605	3.85481e-05
chr7	847018	932403	K27ac_merged_peak_29229	0.404883	9.64168e-05
chr7	1122657	1149578	K27ac_merged_peak_29236	-0.490668	0.0422141
chr7	1742854	1783409	K27ac_merged_peak_29251	0.408245	0.0369368
chr7	7827236	7857594	K27ac_merged_peak_29349	0.432645	0.0268073
chr7	11465319	11478710	K27ac_merged_peak_29374	0.915907	0.0020674
chr7	11558808	11568592	K27ac_merged_peak_29376	0.639401	0.0444422
chr7	11583941	11599955	K27ac_merged_peak_29378	1.34911	3.63523e-06
chr7	11629298	11635851	K27ac_merged_peak_29380	1.14251	0.00770061
chr7	11654041	11667417	K27ac_merged_peak_29381	0.71957	0.0487268
chr7	12101837	12110575	K27ac_merged_peak_29385	1.27715	0.00154296
chr7	14243480	14249179	K27ac_merged_peak_29399	1.32538	0.00241356
chr7	17267924	17292852	K27ac_merged_peak_29451	0.645481	0.00584942
chr7	17335671	17388247	K27ac_merged_peak_29453	0.312131	0.0255259
chr7	22352898	22403920	K27ac_merged_peak_29492	0.550867	1.28027e-05
chr7	26330590	26416796	K27ac_merged_peak_29544	0.351051	0.00824942
chr7	26724403	26750191	K27ac_merged_peak_29548	0.779656	0.000121195
chr7	27837535	27854338	K27ac_merged_peak_29561	0.867861	0.0150246
chr7	33708189	33722312	K27ac_merged_peak_29633	0.586375	0.00583033
chr7	36165647	36236213	K27ac_merged_peak_29661	0.371842	0.00144102
chr7	36311130	36350826	K27ac_merged_peak_29665	0.33817	0.0266887
chr7	37036241	37082790	K27ac_merged_peak_29679	0.42007	0.0232683
chr7	40582479	40592728	K27ac_merged_peak_29734	1.30258	0.00170782
chr7	41038058	41052947	K27ac_merged_peak_29739	-0.87849	0.000261981
chr7	41473270	41496024	K27ac_merged_peak_29749	-0.533612	0.0192021
chr7	46315772	46334719	K27ac_merged_peak_29822	0.698288	0.00149595
chr7	46578799	46599787	K27ac_merged_peak_29827	0.749722	0.000240006
chr7	46688173	46700294	K27ac_merged_peak_29829	0.836961	0.01348
chr7	46797264	46807630	K27ac_merged_peak_29833	0.687433	0.0321372
chr7	51181727	51198665	K27ac_merged_peak_29865	0.893521	0.00178129
chr7	55596899	55627150	K27ac_merged_peak_29899	0.522419	0.0127312
chr7	61967214	61970599	K27ac_merged_peak_29913	-0.450711	0.00315659
chr7	65598969	65638924	K27ac_merged_peak_29945	0.372841	0.0347277
chr7	65696663	65751728	K27ac_merged_peak_29950	0.464504	0.00184521
chr7	73145085	73159890	K27ac_merged_peak_30011	0.714685	0.0116035
chr7	74061181	74114009	K27ac_merged_peak_30038	0.405102	0.0115958
chr7	77311911	77382686	K27ac_merged_peak_30085	0.374245	0.0240342
chr7	79830857	79854743	K27ac_merged_peak_30107	0.533556	0.00815598
chr7	89799009	89811477	K27ac_merged_peak_30168	0.549695	0.0103008
chr7	90031252	90048273	K27ac_merged_peak_30176	0.611447	0.00101702
chr7	90443958	90454635	K27ac_merged_peak_30187	0.814002	0.0224681
chr7	91662801	91703124	K27ac_merged_peak_30197	0.428632	0.0118736
chr7	92366312	92404568	K27ac_merged_peak_30216	0.599991	1.26548e-06
chr7	98625558	98747549	K27ac_merged_peak_30289	0.338621	0.00226945
chr7	98785372	98832530	K27ac_merged_peak_30291	0.651083	1.08059e-08
chr7	98856651	98876839	K27ac_merged_peak_30293	0.861004	0.000947618
chr7	103296528	103309589	K27ac_merged_peak_30391	0.738347	0.00190484
chr7	104770185	104783738	K27ac_merged_peak_30404	0.82344	0.00260811
chr7	104849630	104871673	K27ac_merged_peak_30407	0.892244	1.35533e-05
chr7	105830056	105849094	K27ac_merged_peak_30441	0.665942	0.0167397
chr7	105891687	105932547	K27ac_merged_peak_30443	0.455862	0.0159085
chr7	105993743	106000051	K27ac_merged_peak_30446	1.27826	0.00325804
chr7	106805388	106835875	K27ac_merged_peak_30462	0.549741	0.0018726
chr7	107732304	107740712	K27ac_merged_peak_30478	0.948706	0.0123709
chr7	110156646	110165395	K27ac_merged_peak_30489	0.801249	0.0250304
chr7	110730315	110760053	K27ac_merged_peak_30492	0.759038	7.52283e-06
chr7	111152991	111185456	K27ac_merged_peak_30500	0.566589	0.00280581
chr7	112084341	112097727	K27ac_merged_peak_30518	0.650039	0.00132636
chr7	116158686	116188115	K27ac_merged_peak_30556	0.446288	0.0335691
chr7	116265312	116277596	K27ac_merged_peak_30559	0.574341	0.0320428
chr7	116301060	116358401	K27ac_merged_peak_30560	0.445448	7.87355e-05
chr7	116391272	116485567	K27ac_merged_peak_30562	0.616959	1.359e-10
chr7	117218774	117231667	K27ac_merged_peak_30573	-0.909111	0.00229088
chr7	117244866	117248682	K27ac_merged_peak_30574	-1.22158	0.0355995
chr7	124171034	124184110	K27ac_merged_peak_30630	0.854063	0.0108166
chr7	126569889	126587755	K27ac_merged_peak_30635	0.796347	0.00155647
chr7	128592598	128616626	K27ac_merged_peak_30671	0.714988	0.0359244
chr7	130547711	130637653	K27ac_merged_peak_30708	0.231728	0.0322894
chr7	131006198	131116560	K27ac_merged_peak_30716	0.362235	0.00629741
chr7	134030063	134064284	K27ac_merged_peak_30735	-0.367623	0.0207986
chr7	134102631	134109028	K27ac_merged_peak_30736	-0.891551	0.0426713
chr7	135037064	135045005	K27ac_merged_peak_30757	1.34639	0.000303233
chr7	137708023	137720446	K27ac_merged_peak_30774	1.01084	0.000187394
chr7	139293298	139362512	K27ac_merged_peak_30811	0.305029	0.0341681
chr7	139404299	139485951	K27ac_merged_peak_30813	0.355659	0.000983937
chr7	140606741	140627600	K27ac_merged_peak_30836	0.523576	0.0426761
chr7	149189300	149196932	K27ac_merged_peak_30898	-0.896833	0.0459899
chr7	151303576	151581082	K27ac_merged_peak_30943	0.432313	1.92009e-10
chr7	155705553	155725134	K27ac_merged_peak_31000	0.786485	3.63091e-05
chr8	6453200	6463495	K27ac_merged_peak_31094	1.29452	0.000321656
chr8	8773495	8781239	K27ac_merged_peak_31120	1.04187	0.017774
chr8	9303581	9317166	K27ac_merged_peak_31142	0.507758	0.0414668
chr8	11482308	11491094	K27ac_merged_peak_31186	-1.10882	0.0146957
chr8	11554346	11641402	K27ac_merged_peak_31189	-0.313195	0.0457643
chr8	13217298	13231936	K27ac_merged_peak_31211	-0.668349	0.0477873
chr8	15500630	15518406	K27ac_merged_peak_31217	0.722967	0.000832653
chr8	17074849	17089880	K27ac_merged_peak_31227	0.557653	0.0463854
chr8	18774160	18875906	K27ac_merged_peak_31261	0.272337	0.0190041
chr8	25164322	25192647	K27ac_merged_peak_31336	-0.46879	0.0428963
chr8	25987121	25998808	K27ac_merged_peak_31341	0.842094	0.0173306
chr8	26932345	26953775	K27ac_merged_peak_31357	0.540233	0.0128932
chr8	28195505	28249598	K27ac_merged_peak_31385	0.501516	3.63523e-06
chr8	31967138	31979912	K27ac_merged_peak_31443	1.03453	3.8866e-05
chr8	38638166	38660109	K27ac_merged_peak_31508	0.552398	0.0181707
chr8	40006274	40061860	K27ac_merged_peak_31522	0.456325	3.26173e-05
chr8	43092677	43096151	K27ac_merged_peak_31562	-0.79116	0.0314648
chr8	51591378	51599044	K27ac_merged_peak_31619	1.0458	0.000117436
chr8	53590688	53643023	K27ac_merged_peak_31630	0.627648	0.000313271
chr8	53672729	53679417	K27ac_merged_peak_31631	1.14843	0.0259498
chr8	56877091	56909211	K27ac_merged_peak_31662	0.490822	0.0238206
chr8	58763054	58778229	K27ac_merged_peak_31681	0.861225	0.000825315
chr8	58956385	59005499	K27ac_merged_peak_31685	0.569407	1.17545e-05
chr8	59288830	59301927	K27ac_merged_peak_31691	1.00983	1.93841e-07
chr8	62593633	62639557	K27ac_merged_peak_31728	-0.440502	0.0200416
chr8	62666707	62708202	K27ac_merged_peak_31729	-0.593154	0.000102613
chr8	65660606	65687587	K27ac_merged_peak_31744	0.504779	0.0348583
chr8	65873847	65905759	K27ac_merged_peak_31749	1.19257	4.6575e-09
chr8	67338108	67408781	K27ac_merged_peak_31766	0.517432	1.45428e-06
chr8	67412808	67438441	K27ac_merged_peak_31767	0.508643	0.0298728
chr8	70469873	70483490	K27ac_merged_peak_31788	1.00618	0.000657557
chr8	77721155	77731919	K27ac_merged_peak_31858	0.898911	0.0464652
chr8	81160165	81174331	K27ac_merged_peak_31890	1.06497	6.87747e-05
chr8	81257153	81265320	K27ac_merged_peak_31894	1.10178	0.0185042
chr8	81388617	81447253	K27ac_merged_peak_31897	0.361627	0.0296513
chr8	81824705	81844925	K27ac_merged_peak_31909	0.544549	0.0113674
chr8	81890499	81899565	K27ac_merged_peak_31912	0.848349	0.0308786
chr8	91893918	91905399	K27ac_merged_peak_31985	1.41219	2.02302e-07
chr8	95241591	95262191	K27ac_merged_peak_32008	0.693813	0.00586917
chr8	95263305	95278162	K27ac_merged_peak_32009	0.643456	0.0425364
chr8	97797826	97820239	K27ac_merged_peak_32054	0.530763	0.0285847
chr8	98551336	98573535	K27ac_merged_peak_32076	0.995079	1.00288e-06
chr8	101364990	101410192	K27ac_merged_peak_32124	0.393959	0.0298075
chr8	102163740	102176486	K27ac_merged_peak_32141	0.557791	0.0234128
chr8	102177731	102222160	K27ac_merged_peak_32142	0.568366	0.00107534
chr8	103709568	103723412	K27ac_merged_peak_32174	0.729967	0.0487931
chr8	116584270	116601791	K27ac_merged_peak_32244	0.774265	0.00088349
chr8	118618566	118637210	K27ac_merged_peak_32262	1.31279	3.61489e-12
chr8	118658761	118693512	K27ac_merged_peak_32263	0.80639	2.84878e-08
chr8	118818173	119137630	K27ac_merged_peak_32266	0.266979	0.000694449
chr8	119195711	119216515	K27ac_merged_peak_32268	0.725462	1.56654e-05
chr8	119906933	119919540	K27ac_merged_peak_32281	0.766765	0.0105746
chr8	122984076	122991578	K27ac_merged_peak_32325	1.11789	0.0232683
chr8	123576520	123591467	K27ac_merged_peak_32335	1.1326	1.95017e-06
chr8	123647088	123662413	K27ac_merged_peak_32339	0.717462	0.0120782
chr8	123994485	124004872	K27ac_merged_peak_32348	0.833895	0.0133379
chr8	124621979	124633581	K27ac_merged_peak_32368	0.810304	0.034505
chr8	124634108	124659183	K27ac_merged_peak_32369	1.04293	5.57436e-10
chr8	124673611	124708038	K27ac_merged_peak_32370	1.20057	3.32286e-10
chr8	125535198	125771104	K27ac_merged_peak_32384	0.263203	0.00212369
chr8	126116770	126208296	K27ac_merged_peak_32395	0.515804	1.21292e-08
chr8	126213797	126262075	K27ac_merged_peak_32396	0.387928	0.0102845
chr8	126490976	126595104	K27ac_merged_peak_32403	0.317274	0.000678861
chr8	126601323	126628112	K27ac_merged_peak_32404	0.636485	0.00503757
chr8	126640560	126664750	K27ac_merged_peak_32405	0.575679	0.00235166
chr8	126665814	126684055	K27ac_merged_peak_32406	0.76142	0.000117408
chr8	126687291	126715089	K27ac_merged_peak_32407	0.842248	4.60573e-06
chr8	127461648	127469821	K27ac_merged_peak_32411	1.7449	0.00063993
chr8	129501353	129541975	K27ac_merged_peak_32449	0.63511	0.000473116
chr8	132820451	132832563	K27ac_merged_peak_32470	1.29337	9.74263e-06
chr8	132844492	132878634	K27ac_merged_peak_32471	0.749365	4.3502e-08
chr8	135581543	135599900	K27ac_merged_peak_32492	0.704227	0.00836783
chr8	135786804	135849927	K27ac_merged_peak_32500	0.445108	0.000505525
chr8	141666884	141675053	K27ac_merged_peak_32537	0.967239	0.0115028
chr8	144589399	144687805	K27ac_merged_peak_32583	-0.404929	0.00168114
chr9	4199930	4218103	K27ac_merged_peak_32659	0.551858	0.0361205
chr9	4791408	4875172	K27ac_merged_peak_32671	0.435644	6.93281e-05
chr9	5930690	5961168	K27ac_merged_peak_32690	0.624152	0.00249642
chr9	10230035	10260873	K27ac_merged_peak_32729	0.875378	1.96067e-05
chr9	12769979	12832219	K27ac_merged_peak_32735	0.603704	1.44477e-09
chr9	16327575	16347380	K27ac_merged_peak_32771	0.511487	0.00669736
chr9	16357496	16375814	K27ac_merged_peak_32772	0.766895	0.0167397
chr9	16395035	16426967	K27ac_merged_peak_32774	0.480292	0.00560369
chr9	16438771	16452109	K27ac_merged_peak_32775	0.623939	0.0416709
chr9	17796362	17802919	K27ac_merged_peak_32792	1.42022	0.000866721
chr9	18434652	18460608	K27ac_merged_peak_32796	0.479909	0.0389279
chr9	21825073	21843420	K27ac_merged_peak_32823	0.89978	9.6801e-06
chr9	21849725	21878460	K27ac_merged_peak_32824	0.638337	7.0832e-05
chr9	27370854	27389539	K27ac_merged_peak_32861	0.759795	0.00139212
chr9	27430624	27440162	K27ac_merged_peak_32863	1.15716	0.00305443
chr9	27523217	27556554	K27ac_merged_peak_32865	1.07321	2.49684e-11
chr9	31267897	31276529	K27ac_merged_peak_32876	1.34064	0.000108621
chr9	34214607	34243853	K27ac_merged_peak_32924	0.581448	0.0318292
chr9	35504428	35557985	K27ac_merged_peak_32959	-0.505818	2.04392e-05
chr9	35899012	35932242	K27ac_merged_peak_32972	-0.459852	0.00967424
chr9	36088030	36095584	K27ac_merged_peak_32976	-0.840853	0.026562
chr9	37409180	37474452	K27ac_merged_peak_33003	-0.393011	0.00600226
chr9	71777360	71876216	K27ac_merged_peak_33045	0.321498	0.0112984
chr9	72073735	72092040	K27ac_merged_peak_33047	0.701496	0.0149033
chr9	72191723	72212020	K27ac_merged_peak_33052	0.541053	0.00583412
chr9	72247100	72290559	K27ac_merged_peak_33054	0.486365	8.43179e-05
chr9	72350507	72376047	K27ac_merged_peak_33056	-0.581239	0.00365591
chr9	72507051	72515777	K27ac_merged_peak_33058	-0.913678	0.0306721
chr9	75512361	75574311	K27ac_merged_peak_33096	-0.353392	0.0161969
chr9	75588644	75618779	K27ac_merged_peak_33097	-0.564332	0.000174218
chr9	75646787	75658170	K27ac_merged_peak_33099	-0.924196	0.0387577
chr9	75664495	75671943	K27ac_merged_peak_33100	-0.910683	0.0149033
chr9	75686198	75701639	K27ac_merged_peak_33101	-1.31418	4.36177e-07
chr9	85162058	85184237	K27ac_merged_peak_33187	0.664855	0.0326562
chr9	85190112	85202513	K27ac_merged_peak_33188	0.910525	0.00690952
chr9	88928198	88978082	K27ac_merged_peak_33227	0.654541	2.11709e-08
chr9	88978892	88990568	K27ac_merged_peak_33228	1.01356	0.000211654
chr9	89010610	89031052	K27ac_merged_peak_33230	0.964223	6.21356e-10
chr9	90109803	90246667	K27ac_merged_peak_33246	0.438435	3.87119e-06
chr9	93089895	93099708	K27ac_merged_peak_33294	-1.61892	2.67499e-05
chr9	93745064	93772028	K27ac_merged_peak_33298	0.647742	5.90997e-06
chr9	93813638	93830526	K27ac_merged_peak_33300	0.897116	4.38629e-06
chr9	93830617	93849665	K27ac_merged_peak_33301	0.867129	0.00812847
chr9	93850687	93869340	K27ac_merged_peak_33302	0.734044	0.00432634
chr9	93942585	93987732	K27ac_merged_peak_33307	0.509769	0.000178704
chr9	94034256	94044575	K27ac_merged_peak_33310	0.861641	0.0270586
chr9	94060700	94072643	K27ac_merged_peak_33311	0.832196	0.0181587
chr9	94163221	94197637	K27ac_merged_peak_33314	0.441516	0.0024666
chr9	95142325	95157693	K27ac_merged_peak_33324	1.05833	0.000104323
chr9	95416900	95435373	K27ac_merged_peak_33329	-0.641891	0.0409373
chr9	95466132	95471362	K27ac_merged_peak_33330	1.74997	0.000161333
chr9	96743892	96752015	K27ac_merged_peak_33349	1.18886	0.0027084
chr9	97424863	97440121	K27ac_merged_peak_33359	-0.696918	0.0336596
chr9	100261930	100281953	K27ac_merged_peak_33420	0.604768	0.012298
chr9	102097884	102132183	K27ac_merged_peak_33449	0.938106	2.03796e-09
chr9	103957254	103970568	K27ac_merged_peak_33468	0.782231	0.0435192
chr9	104179348	104221330	K27ac_merged_peak_33474	-0.424454	0.00472555
chr9	107805190	107840711	K27ac_merged_peak_33498	0.515604	0.000381912
chr9	108454731	108459919	K27ac_merged_peak_33515	0.841123	0.047617
chr9	109933447	109942496	K27ac_merged_peak_33529	0.781817	0.0483491
chr9	109996240	110016039	K27ac_merged_peak_33530	0.621959	0.00307919
chr9	111839496	111882935	K27ac_merged_peak_33560	0.394257	0.00529553
chr9	112708307	112762459	K27ac_merged_peak_33576	0.342757	0.0432045
chr9	114320366	114402067	K27ac_merged_peak_33596	-0.496236	0.000194799
chr9	114521574	114526491	K27ac_merged_peak_33600	1.10046	0.0416514
chr9	114557211	114564347	K27ac_merged_peak_33601	1.20053	0.00288323
chr9	114648778	114841983	K27ac_merged_peak_33603	0.60305	8.68491e-18
chr9	115940911	115956176	K27ac_merged_peak_33625	0.656552	0.0348514
chr9	116127520	116175733	K27ac_merged_peak_33631	-0.420518	0.00770061
chr9	116407577	116421005	K27ac_merged_peak_33643	-0.796854	0.00461224
chr9	116466604	116476818	K27ac_merged_peak_33645	0.70395	0.0452163
chr9	119321000	119338093	K27ac_merged_peak_33689	-0.627232	0.0337309
chr9	120476583	120489361	K27ac_merged_peak_33699	0.821216	0.0370914
chr9	123143524	123160036	K27ac_merged_peak_33708	-0.740942	0.00101207
chr9	123279168	123314199	K27ac_merged_peak_33712	-0.564254	0.04482
chr9	124034412	124052686	K27ac_merged_peak_33726	0.523959	0.0306354
chr9	124734316	124765899	K27ac_merged_peak_33741	0.596336	0.000771176
chr9	129147296	129191747	K27ac_merged_peak_33835	0.566363	0.00109478
chr9	129915440	129925617	K27ac_merged_peak_33848	0.946629	0.000891242
chr9	132764552	132810793	K27ac_merged_peak_33954	0.58413	4.17124e-06
chr9	134465093	134558769	K27ac_merged_peak_33994	0.323388	0.00332047
chr9	135987005	136027636	K27ac_merged_peak_34009	0.397313	0.0302067
chr9	138877695	138917531	K27ac_merged_peak_34049	0.434106	0.0181565
chr9	139723097	139771854	K27ac_merged_peak_34074	-0.408606	0.0471962
chrX	21814623	21826456	K27ac_merged_peak_34218	0.907707	0.00267695
chrX	28150562	28164031	K27ac_merged_peak_34239	0.886386	0.00322165
chrX	38794792	38801977	K27ac_merged_peak_34279	0.788367	0.0425364
chrX	40938950	40957260	K27ac_merged_peak_34310	0.647837	0.00347101
chrX	45364258	45378866	K27ac_merged_peak_34335	0.581683	0.0153012
chrX	46479338	46503449	K27ac_merged_peak_34346	0.52158	0.021286
chrX	46557971	46576576	K27ac_merged_peak_34347	0.607263	0.0357987
chrX	47719033	47726120	K27ac_merged_peak_34372	1.05965	0.0232239
chrX	85287335	85297540	K27ac_merged_peak_34551	1.19722	0.000500794
chrX	106813597	106819649	K27ac_merged_peak_34620	1.13444	0.0125774
chrX	122298217	122307309	K27ac_merged_peak_34699	0.672451	0.0492169
chrX	129805518	129817881	K27ac_merged_peak_34734	0.677766	0.0300212
chrX	138273977	138288742	K27ac_merged_peak_34771	1.12049	4.28015e-07
chrX	149363917	149376900	K27ac_merged_peak_34789	0.839096	0.011812
chrX	149801137	149808388	K27ac_merged_peak_34795	1.28719	0.000120737
chrX	153302344	153313304	K27ac_merged_peak_34818	1.03258	0.0103008
chrY	7799699	7819810	K27ac_merged_peak_34855	1.02344	2.59044e-05
chrY	15478209	15486865	K27ac_merged_peak_34885	0.894374	0.0347277
chrY	16445500	16465708	K27ac_merged_peak_34891	0.710492	0.00896645
